# Supplementary material for: Evolution, substrate specificity and subfamily classification of glycoside hydrolase family 5 (GH5)
Source: PubMed Central journal article supplement (PMC3526467; doi:10.1186/1471-2148-12-186), 2012-09-20
Supplement: 1471-2148-12-186-S1.pdf [file 1471-2148-12-186-S1.pdf]

**Legend to Supplementary Figure 1.** – Rectangular phylogram view of the phylogenetic tree of family GH5. Branches corresponding to subfamilies 1–53 are shown in color and the individual subfamilies have their corresponding subfamily numbers as indicated in Fig. 1. The branches corresponding to sequences not included into subfamilies are in black. Each individual protein module node is identified by a varying number of fields separated by “|” indicating: (i) the organism, with 3 letters for the genre and either 5 letters for the species or full strain code; (ii) the protein accession in public databases, typically GenBank; (iii) if attributed, the subfamily number or other information; (iv) if available, EC numbers (node in bold) or a “\*” (node in bold and italic) to indicate precise enzyme characterizations or a simple activity tests, respectively. A suffix like “\_2” may indicate the module position if more than one GH5 module is present on peptide. Lower confidence nodes with a SH-like local support below 0.7 (varying from low 0 to strong 1) are indicated with a black dot. Identified sequences without complete catalytic machinery are in red.

Supplementary Fig S1

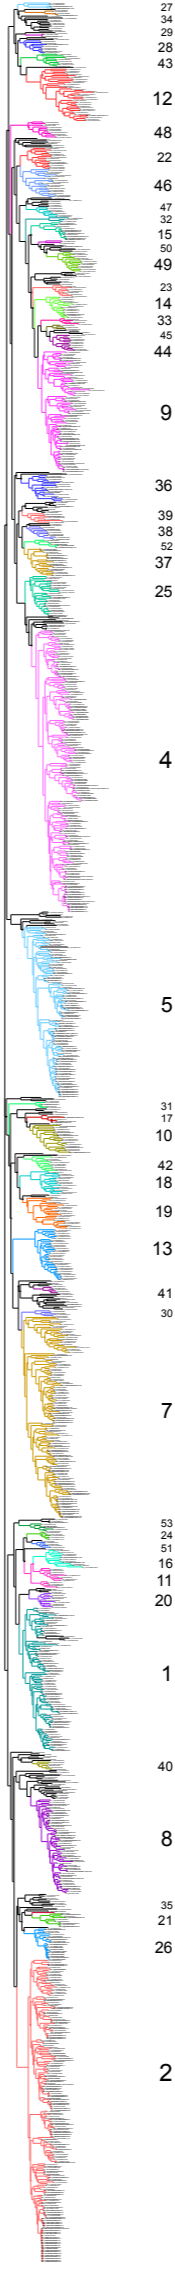

# Figure GH5\_1

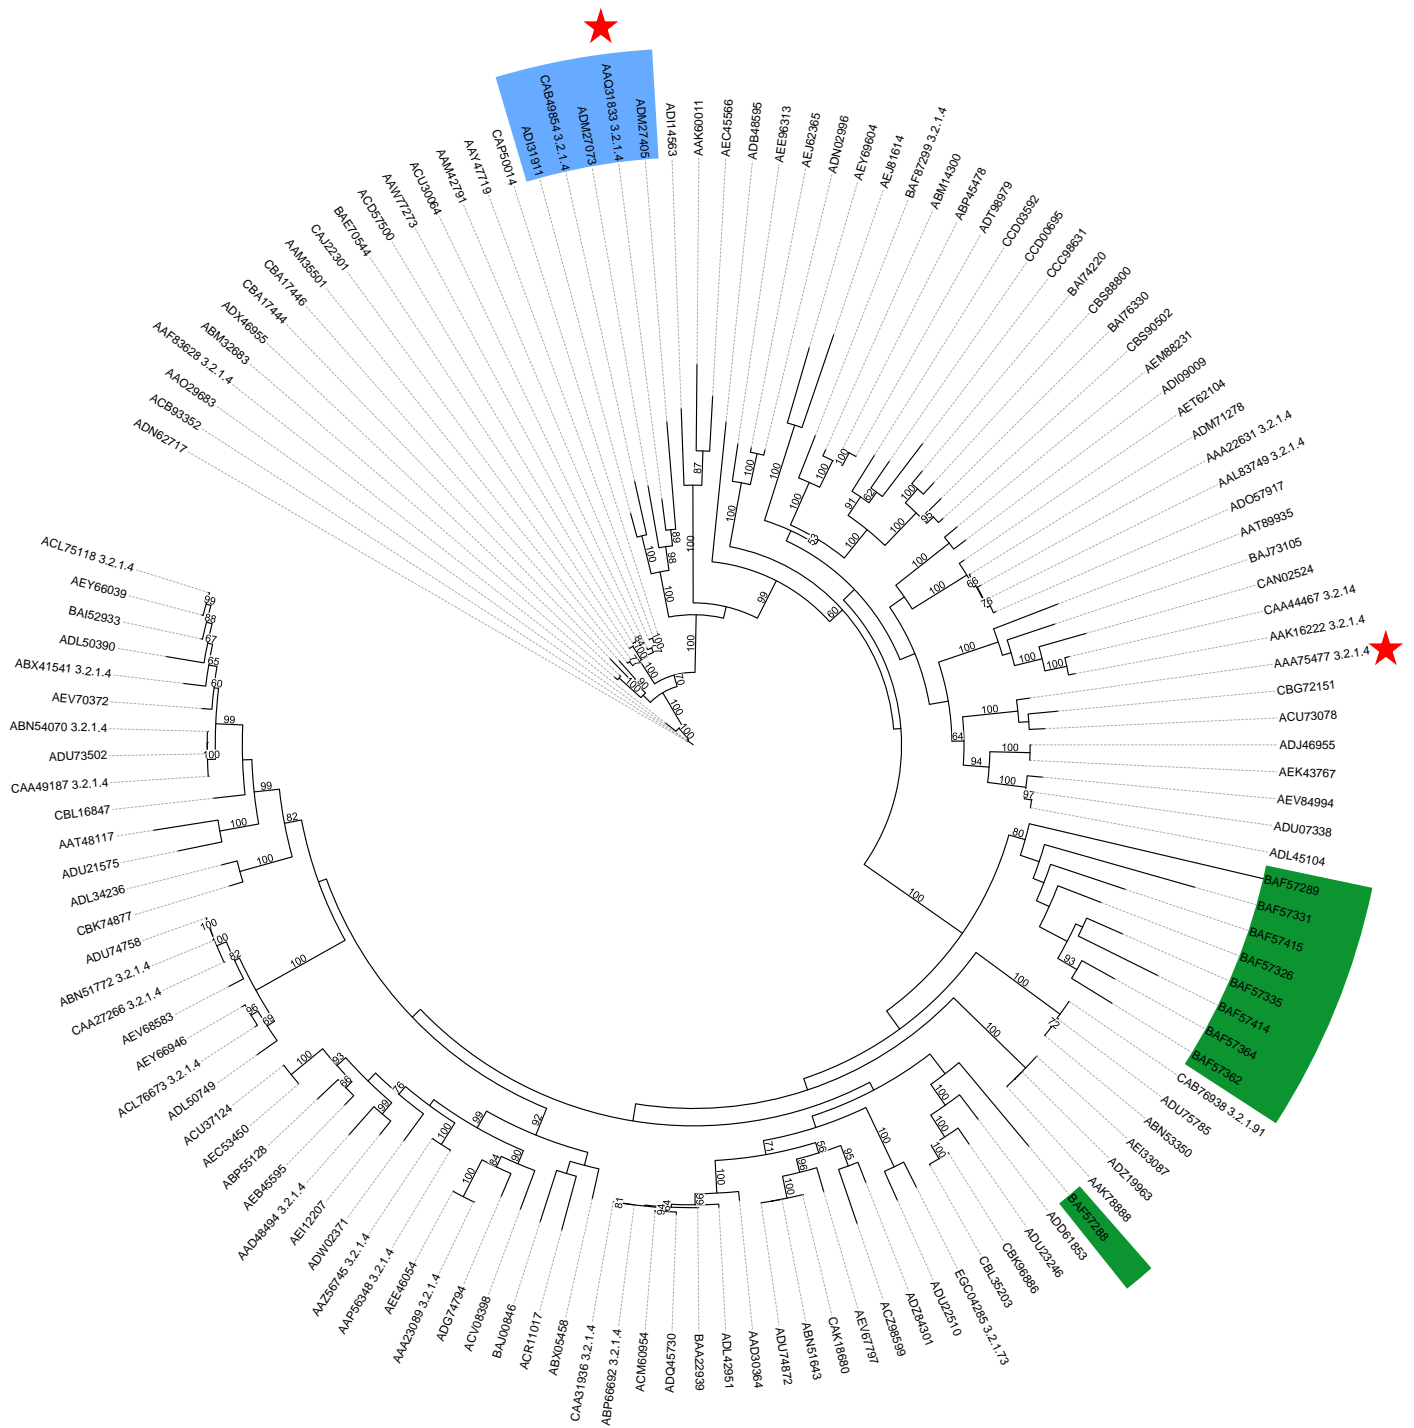

Figure GH5\_1:

Phylogenetic tree on subfamily GH5\_1 based on maximum likelihood with 100 bootstrap replications. Only the GH5 catalytic domain is used for the phylogenetic analysis. Bootstrap values > 50 are displayed. The green range marks protist sequences, whereas the blue range marks sequences from Archaea. Bacterial sequences are displayed without color. Enzymes with a solved 3-D structure are marked with a red star.

Figure GH5\_2

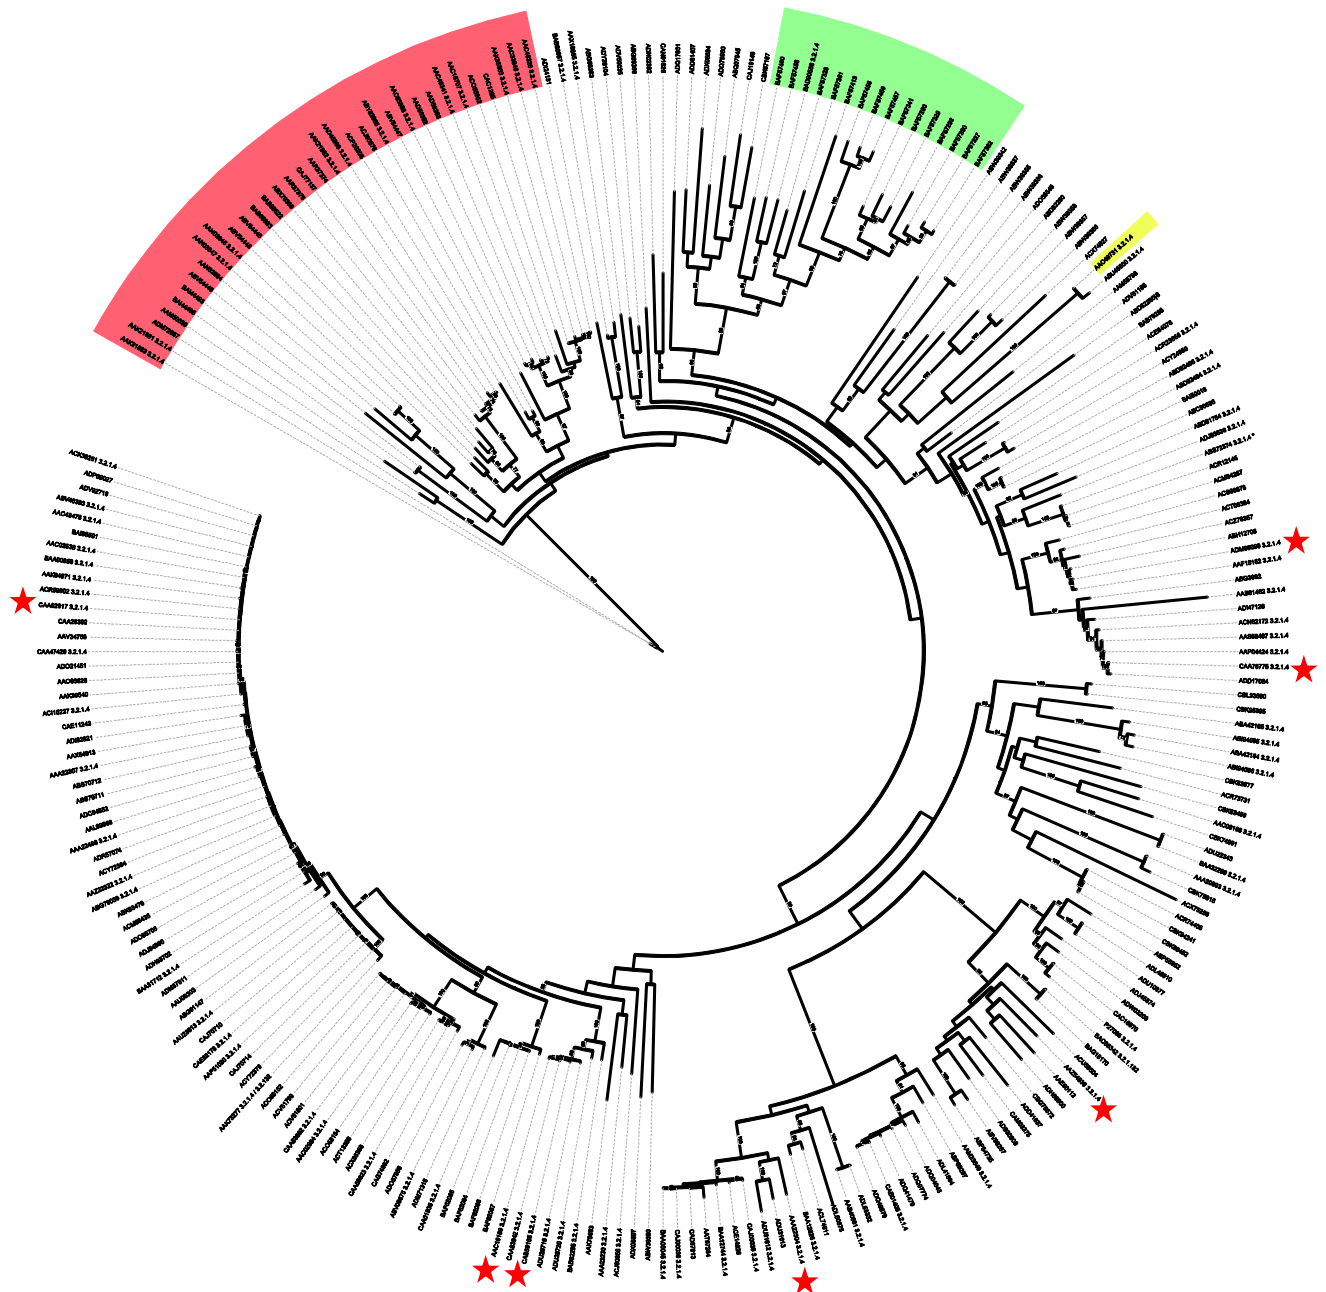

Figure GH5\_2:

Phylogenetic tree on subfamily GH5\_2 based on maximum likelihood with 100 bootstrap replications. Only the GH5 catalytic domain is used for the phylogenetic analysis. Bootstrap values > 50 are displayed. The green range marks protist sequences, whereas the red range marks sequences from Metazoa and yellow marks a fungal enzyme. Bacterial sequences are displayed without color. Enzymes with a solved 3-D structure are marked with a red star.

**Figure GH5\_4**

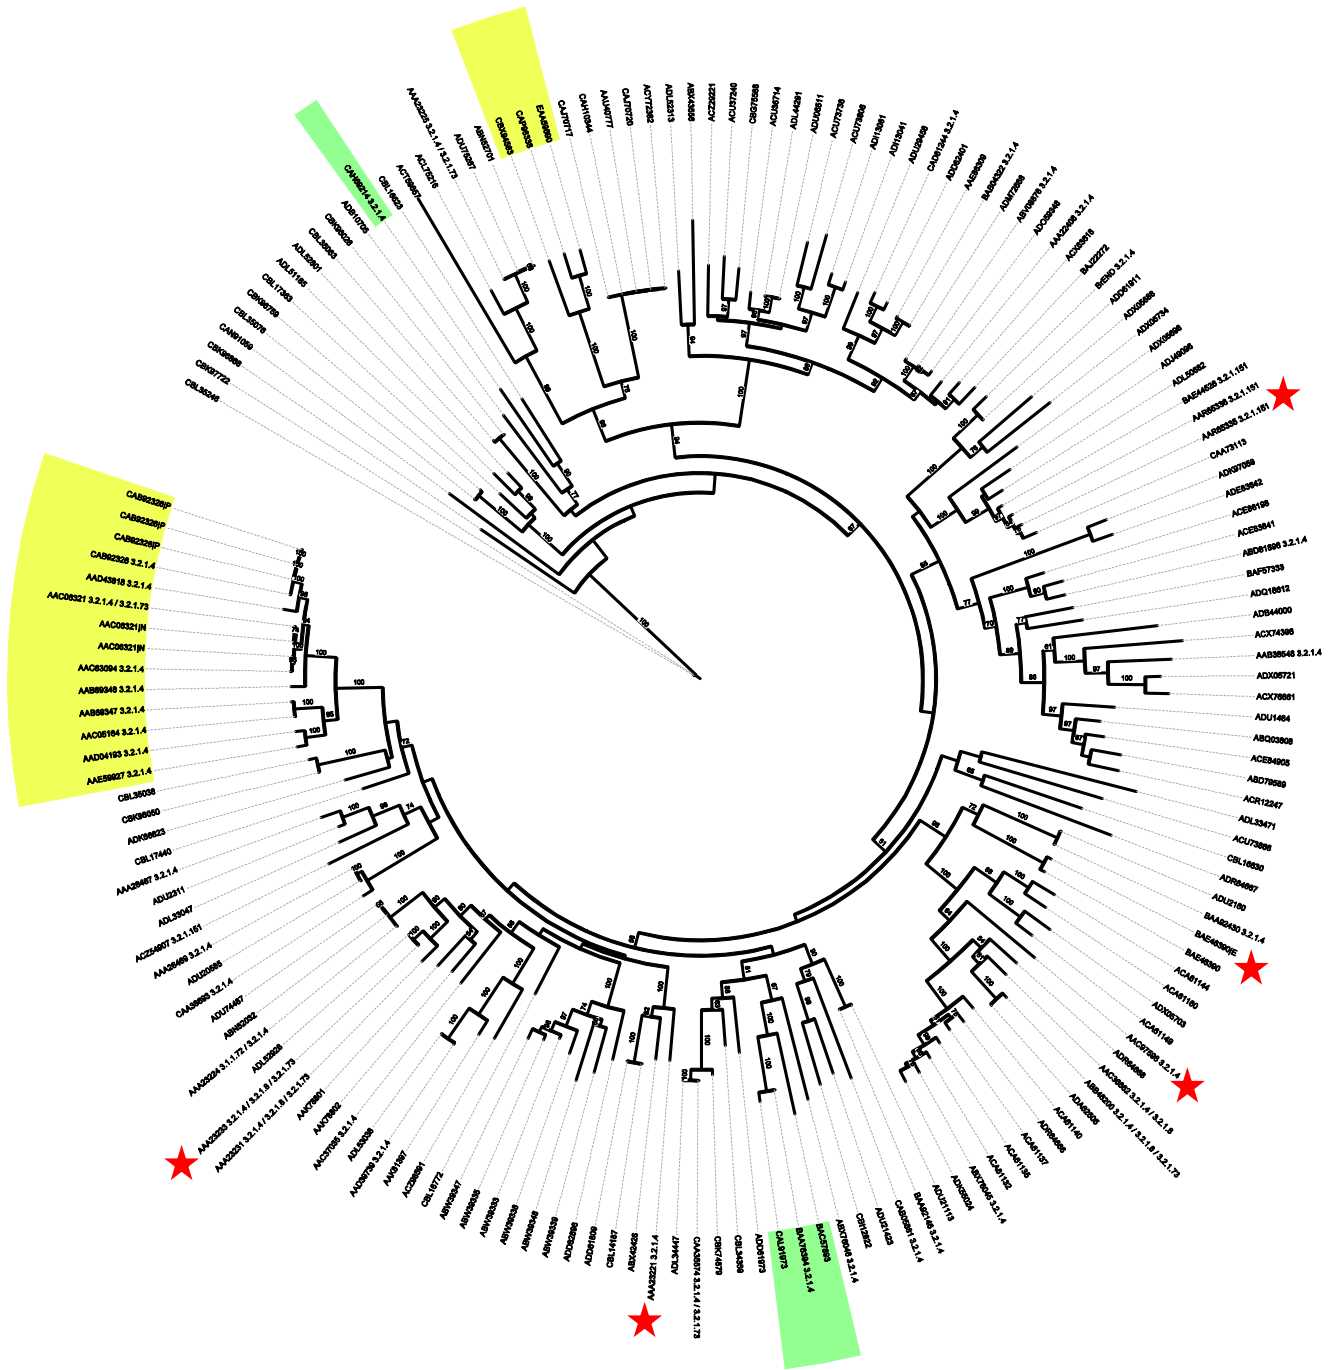

Figure GH5\_4:

Phylogenetic tree on subfamily GH5\_4 based on maximum likelihood with 100 bootstrap replications. Only the GH5 catalytic domain is used for the phylogenetic analysis. Bootstrap values > 50 are displayed. The green range marks Alveolata sequences, whereas the yellow range marks fungal sequences. Bacterial sequences are displayed without color. Enzymes with a solved 3-D structure are marked with a red star.

Figure GH5\_5

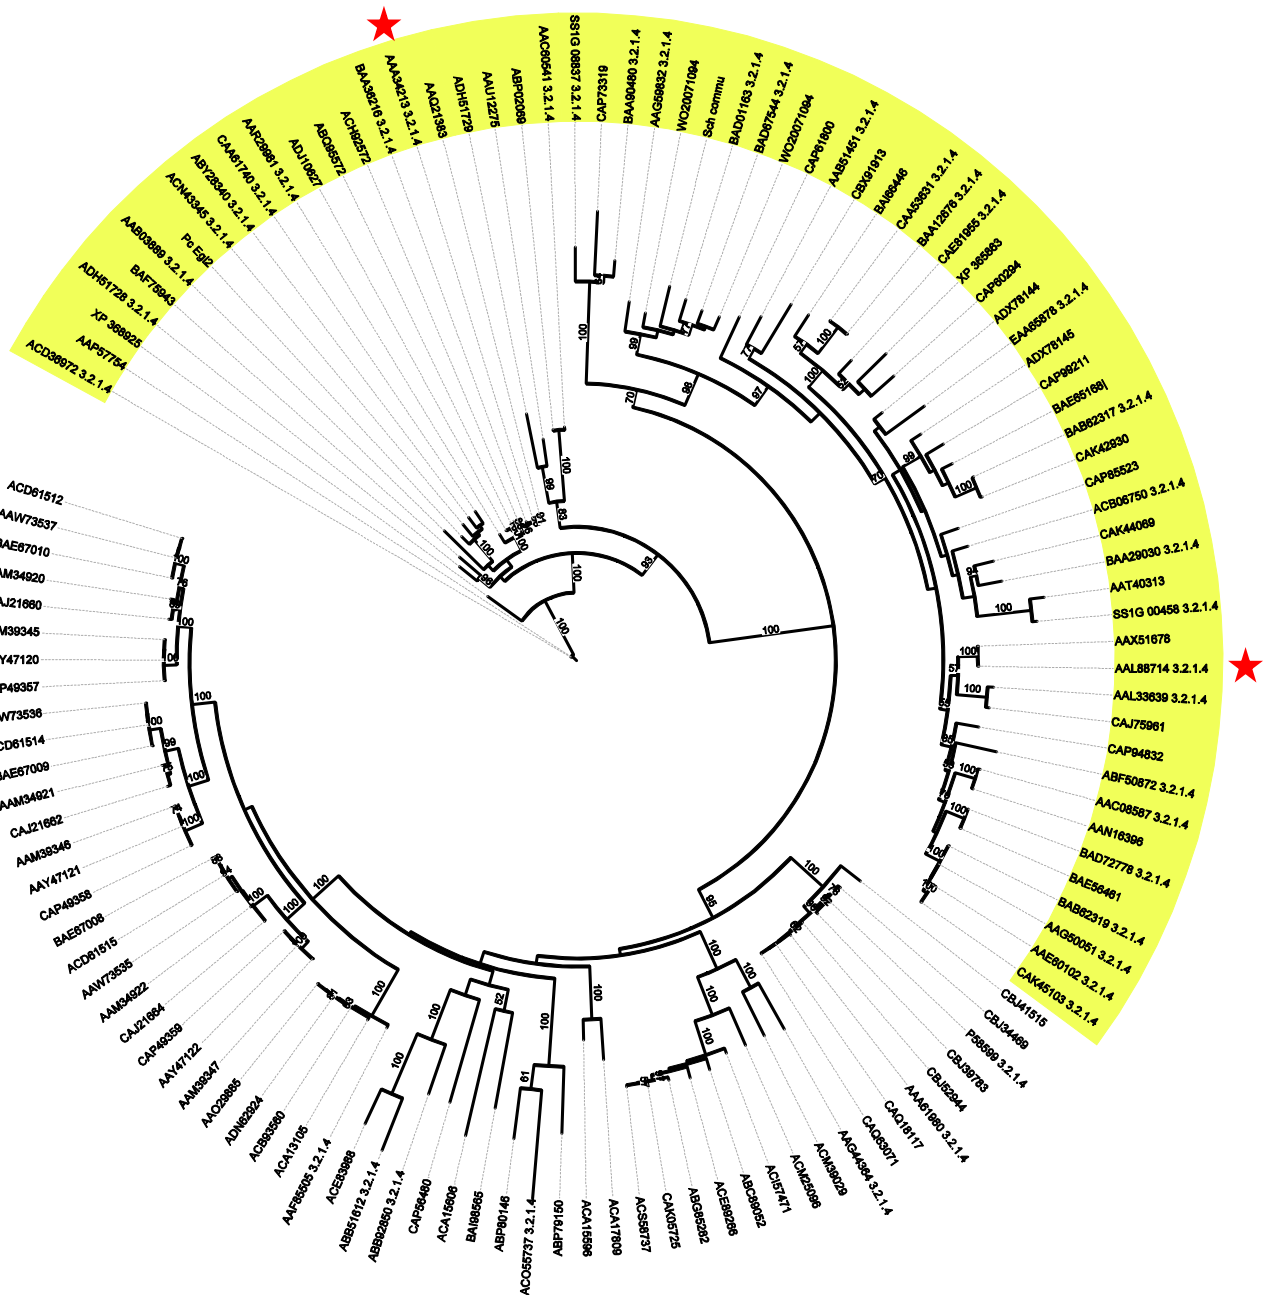

Figure GH5\_5:

Phylogenetic tree on subfamily GH5\_5 based on maximum likelihood with 100 bootstrap replications. Only the GH5 catalytic domain is used for the phylogenetic analysis. Bootstrap values > 50 are displayed. The yellow range marks fungal sequences. Bacterial sequences are displayed without color. Enzymes with a solved 3-D structure are marked with a red star.

Figure GH5\_7

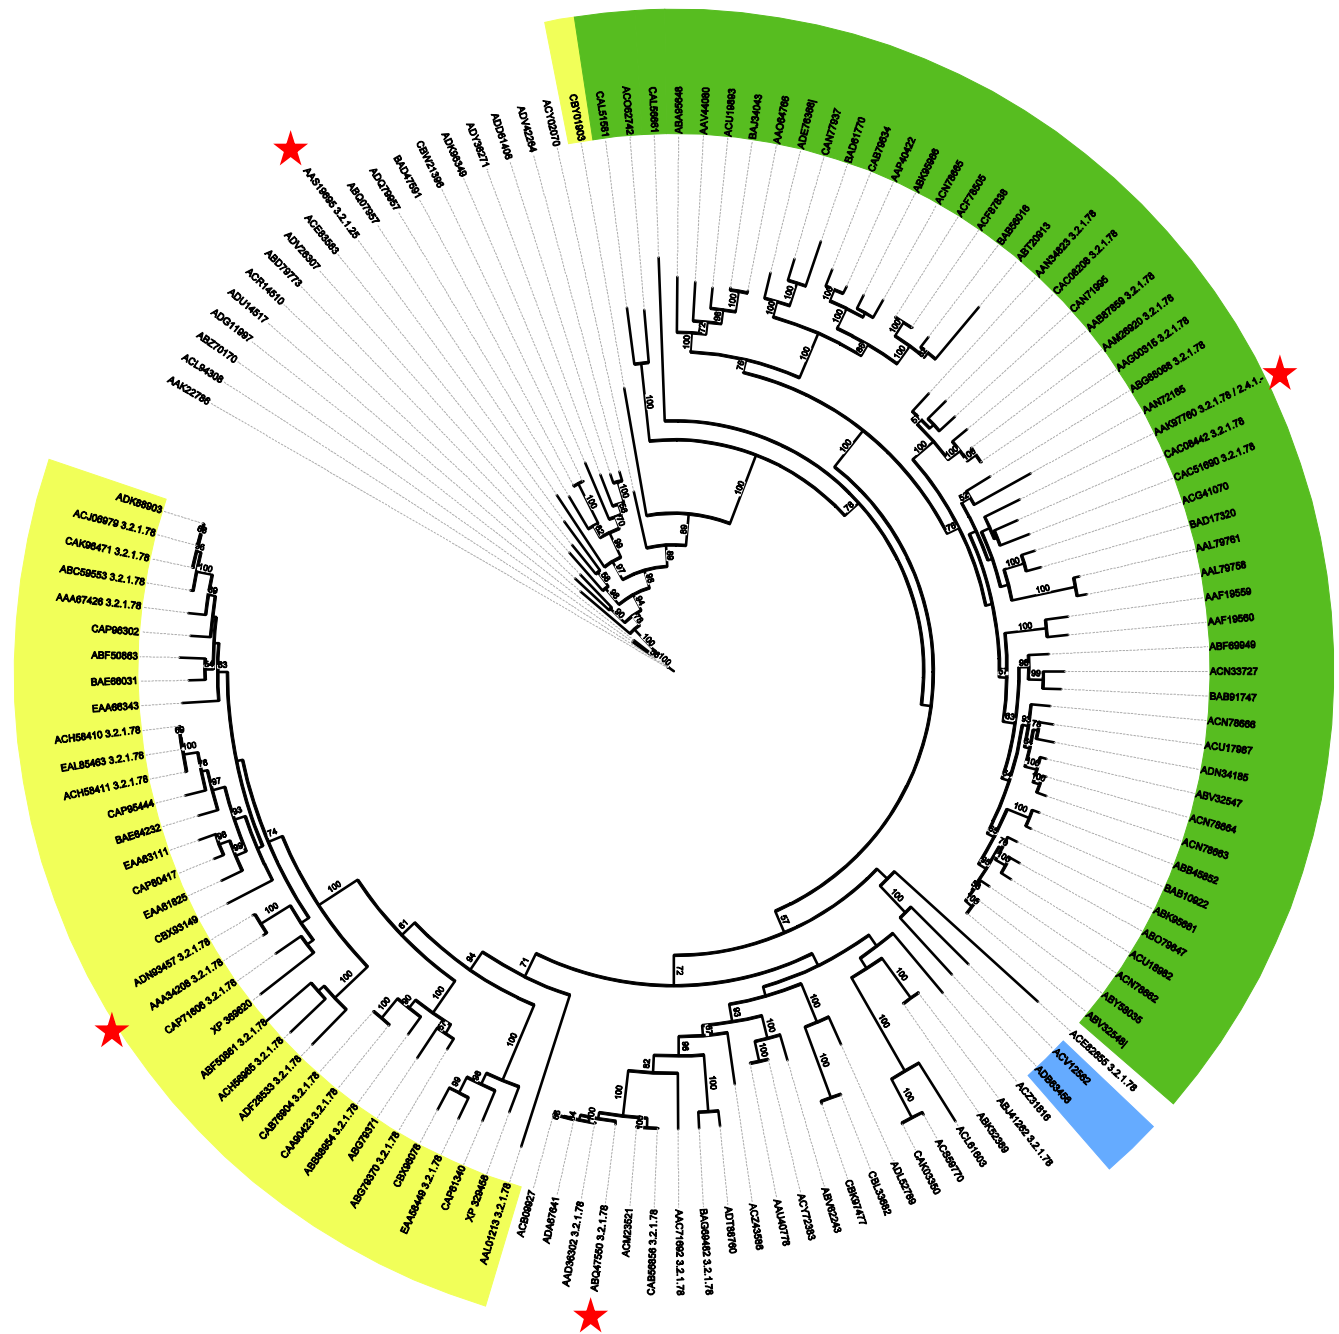

Figure GH5\_7:

Phylogenetic tree on subfamily GH5\_7 based on maximum likelihood with 100 bootstrap replications. Only the GH5 catalytic domain is used for the phylogenetic analysis. Bootstrap values > 50 are displayed. The green range marks plant sequences, whereas the blue range marks sequences from Archea and yellow marks fungal enzymes. Bacterial sequences are displayed without color. Enzymes with a solved 3-D structure are marked with a red star.

# Figure GH5\_8

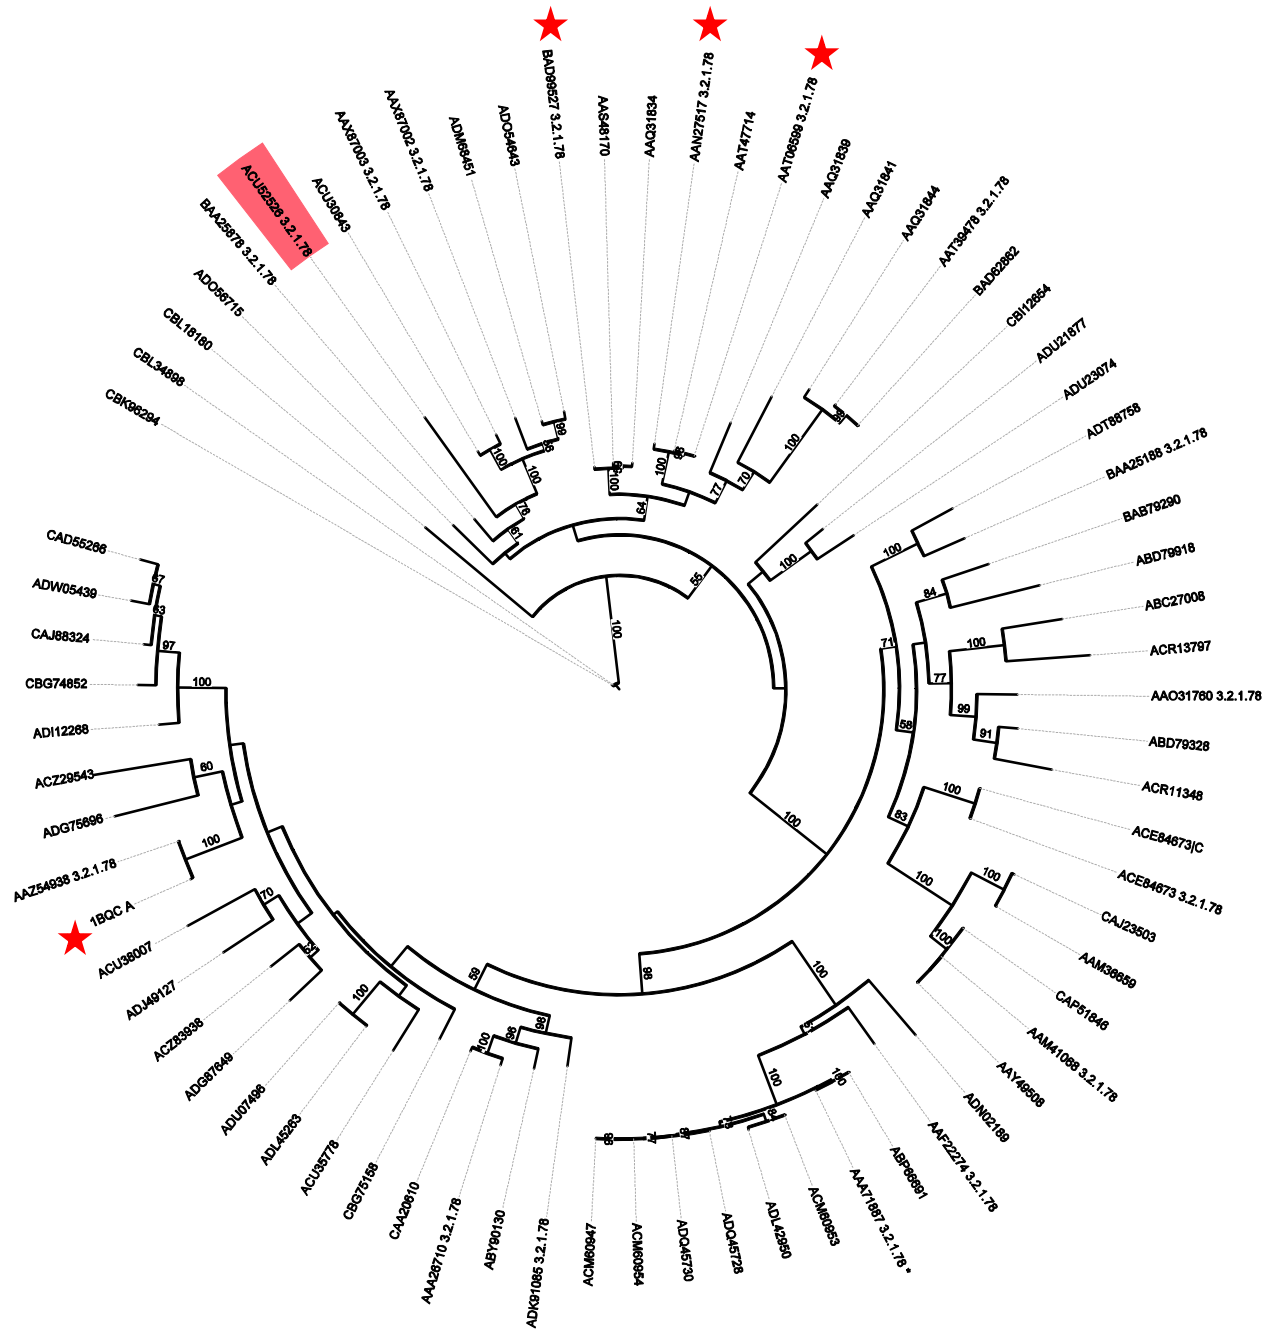

Figure GH5\_8:

Phylogenetic tree on subfamily GH5\_8 based on maximum likelihood with 100 bootstrap replications. Only the GH5 catalytic domain is used for the phylogenetic analysis. Bootstrap values > 50 are displayed. The red range marks a sequence belonging to the Metazoa kingdom. Bacterial sequences are displayed without color. Enzymes with a solved 3-D structure are marked with a red star.



# Figure GH5\_9

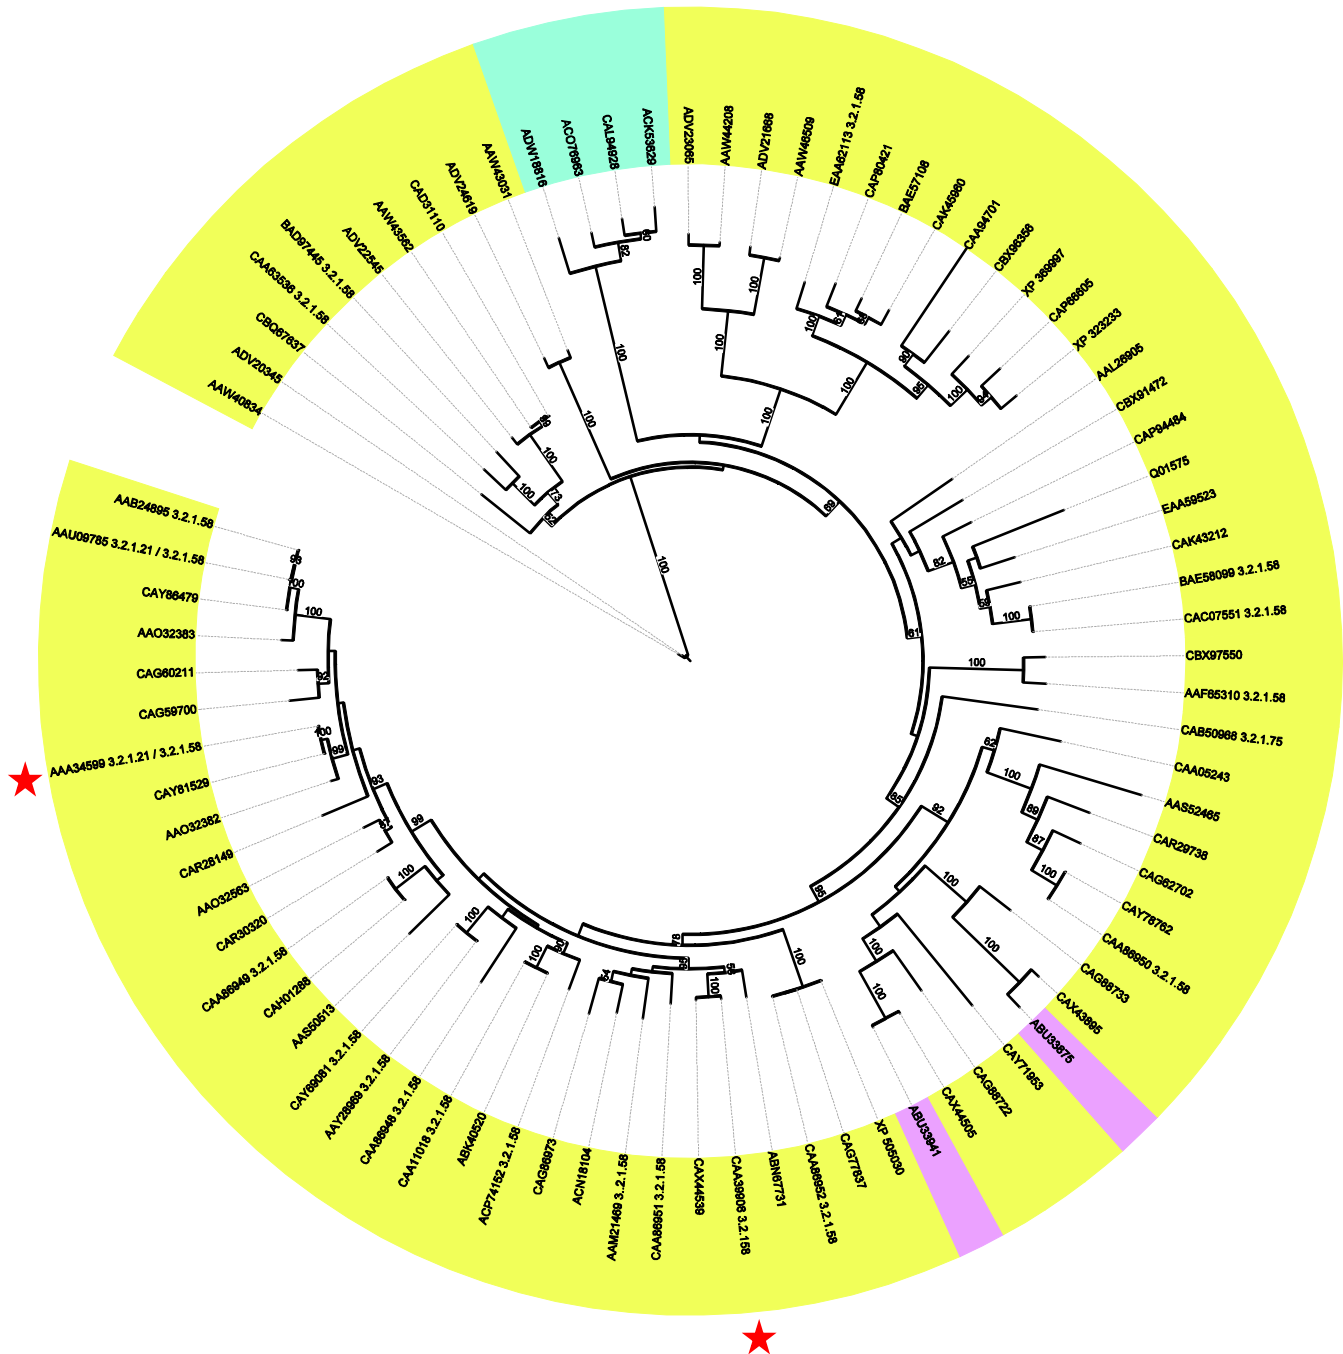

Figure GH5\_9:

Phylogenetic tree on subfamily GH5\_9 based on maximum likelihood with 100 bootstrap replications. Only the GH5 catalytic domain is used for the phylogenetic analysis. Bootstrap values > 50 are displayed. The blue-green range marks bacterial sequences, whereas the purple range marks sequences from Uncultivated organisms and yellow marks fungal enzymes. Enzymes with a solved 3-D structure are marked with a red star.

**Figure GH5\_10**

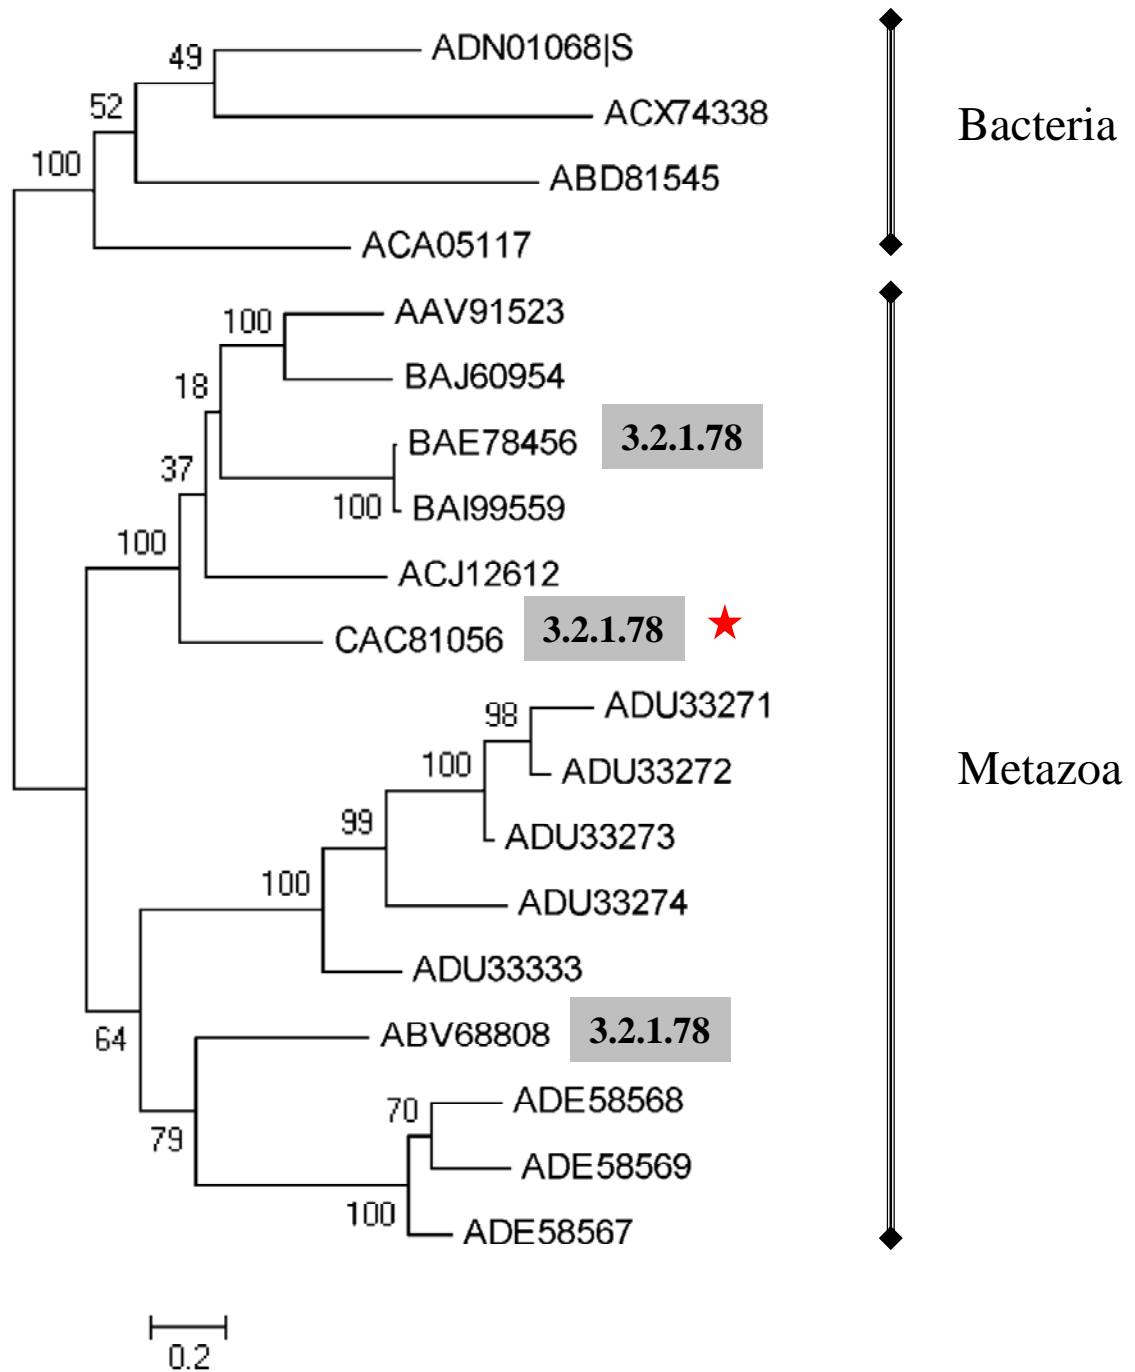

Figure GH5\_10:

Phylogenetic tree on subfamily GH5\_10 based on maximum likelihood with 100 bootstrap replications. Only the GH5 catalytic domain is used for the phylogenetic analysis. All bootstrap values are displayed. The only enzyme with a solved 3-D structure is marked with a red star.

# Figure GH5\_11

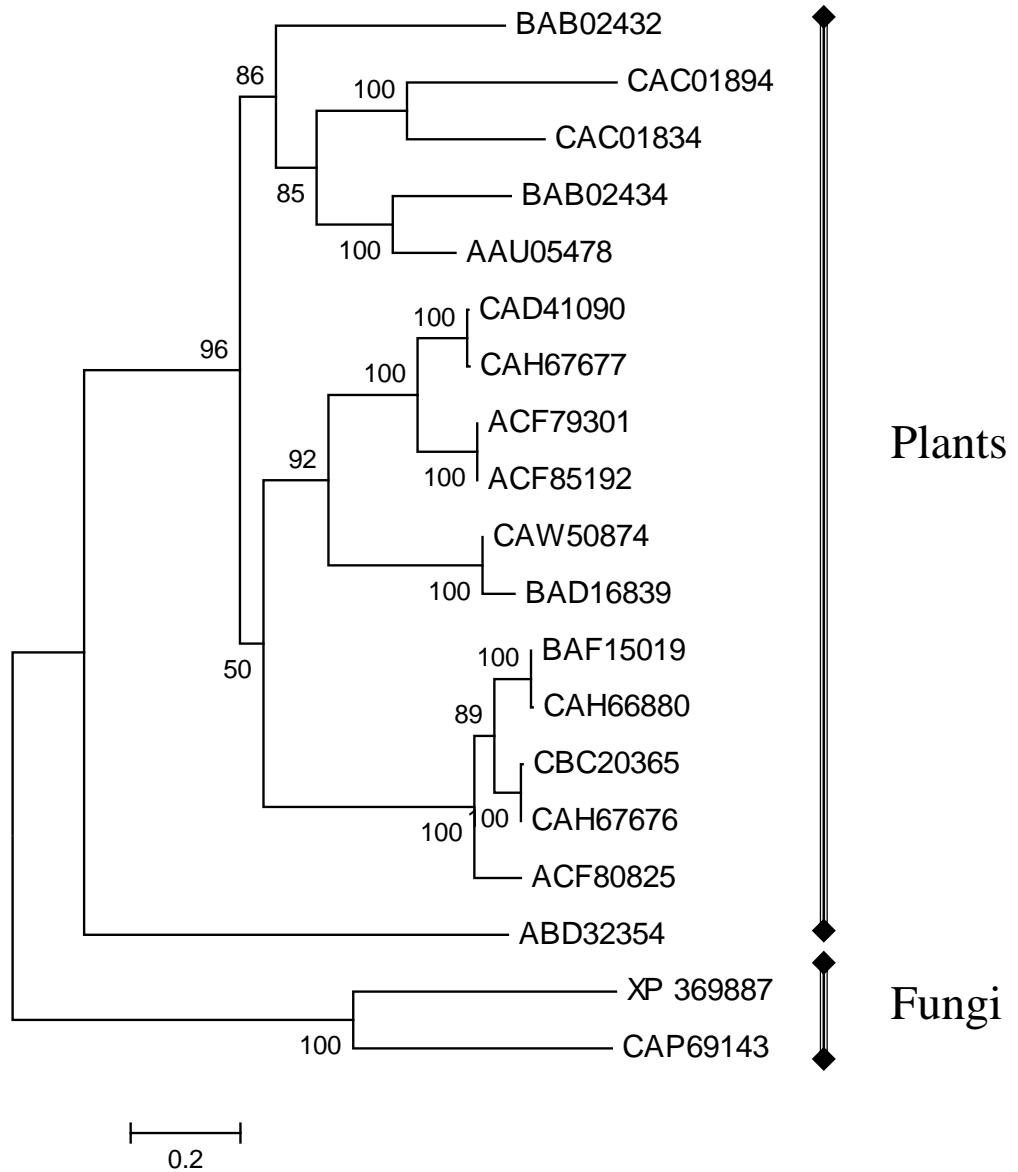

Figure GH5\_11:

Phylogenetic tree on subfamily GH5\_11 based on maximum likelihood with 100 bootstrap replications. Only the GH5 catalytic domain is used for the phylogenetic analysis. All bootstrap values are displayed.

**Figure GH5\_12**

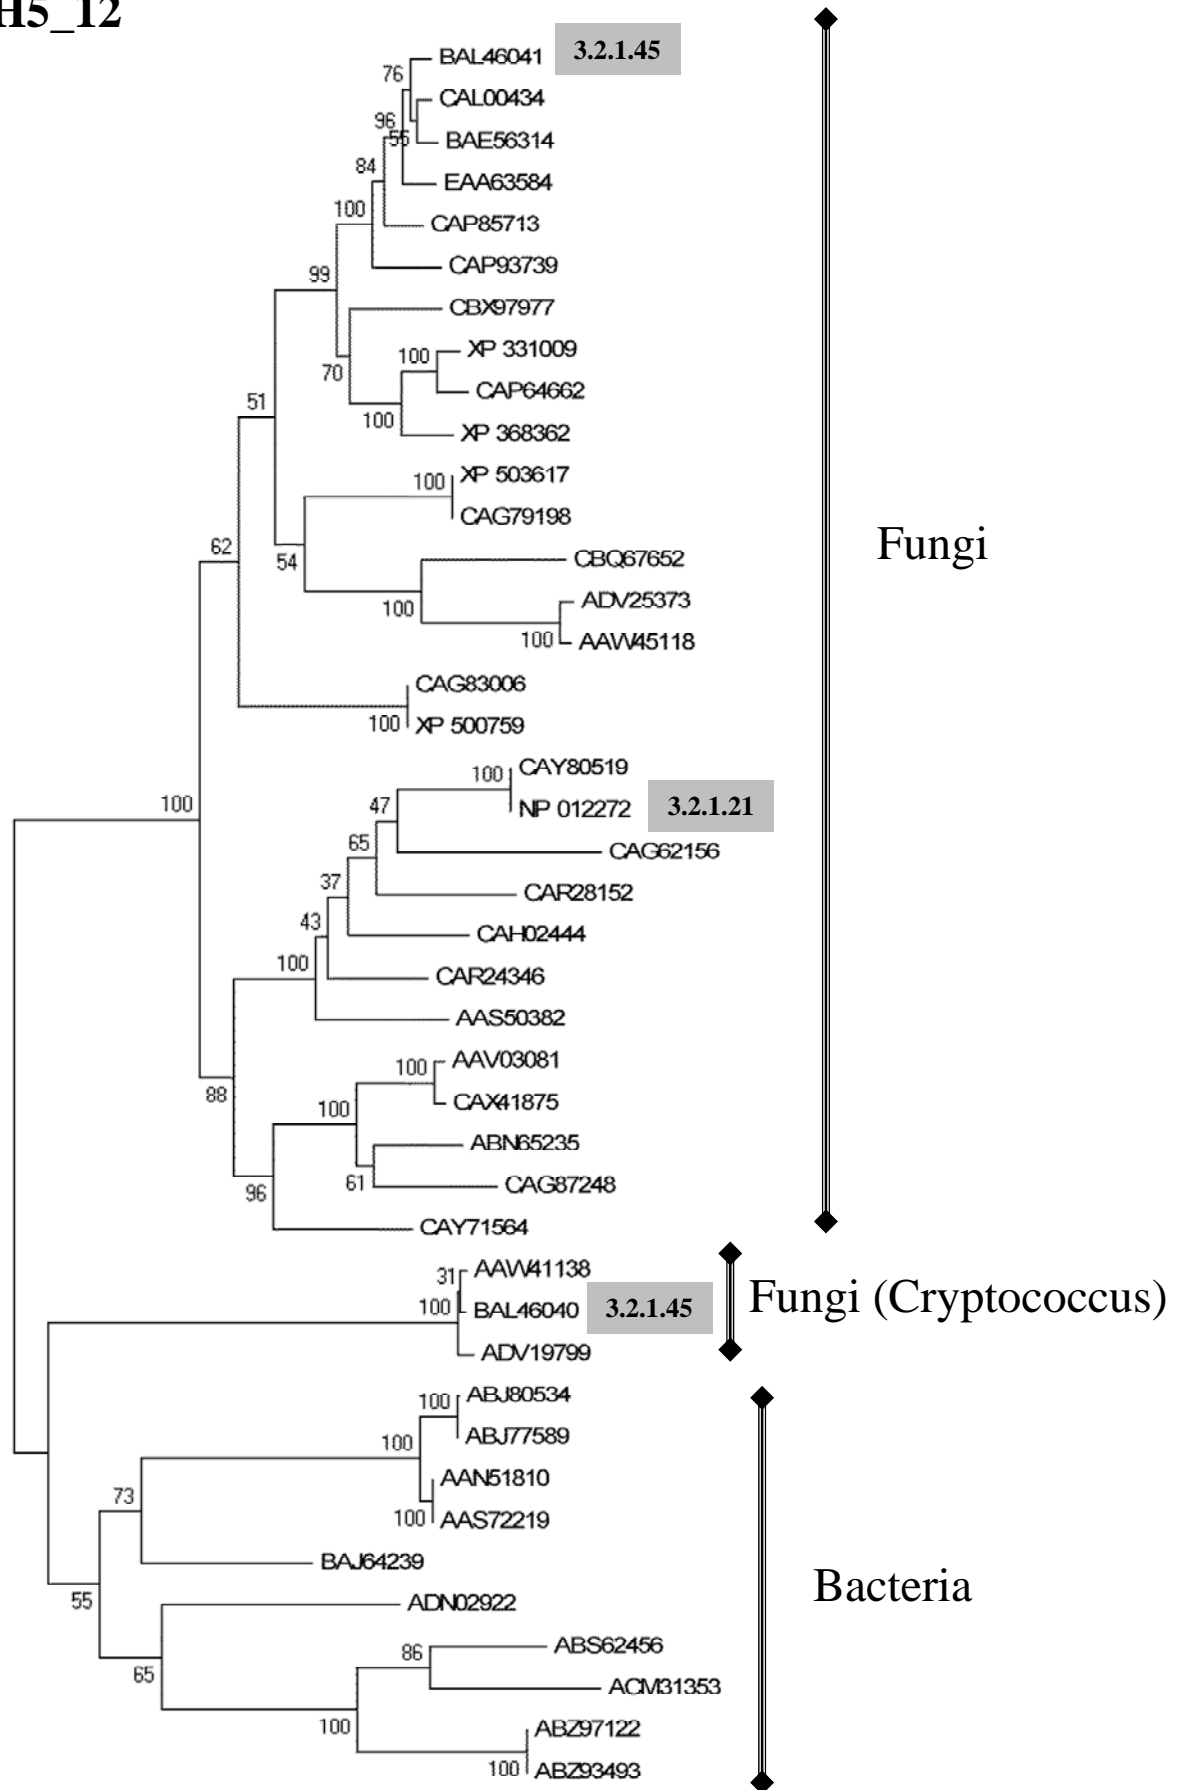

Figure GH5\_12:

0.2

Phylogenetic tree on subfamily GH5\_12 based on maximum likelihood with 100 bootstrap replications. Only the GH5 catalytic domain is used for the phylogenetic analysis. All bootstrap values are displayed.

Figure GH5\_13

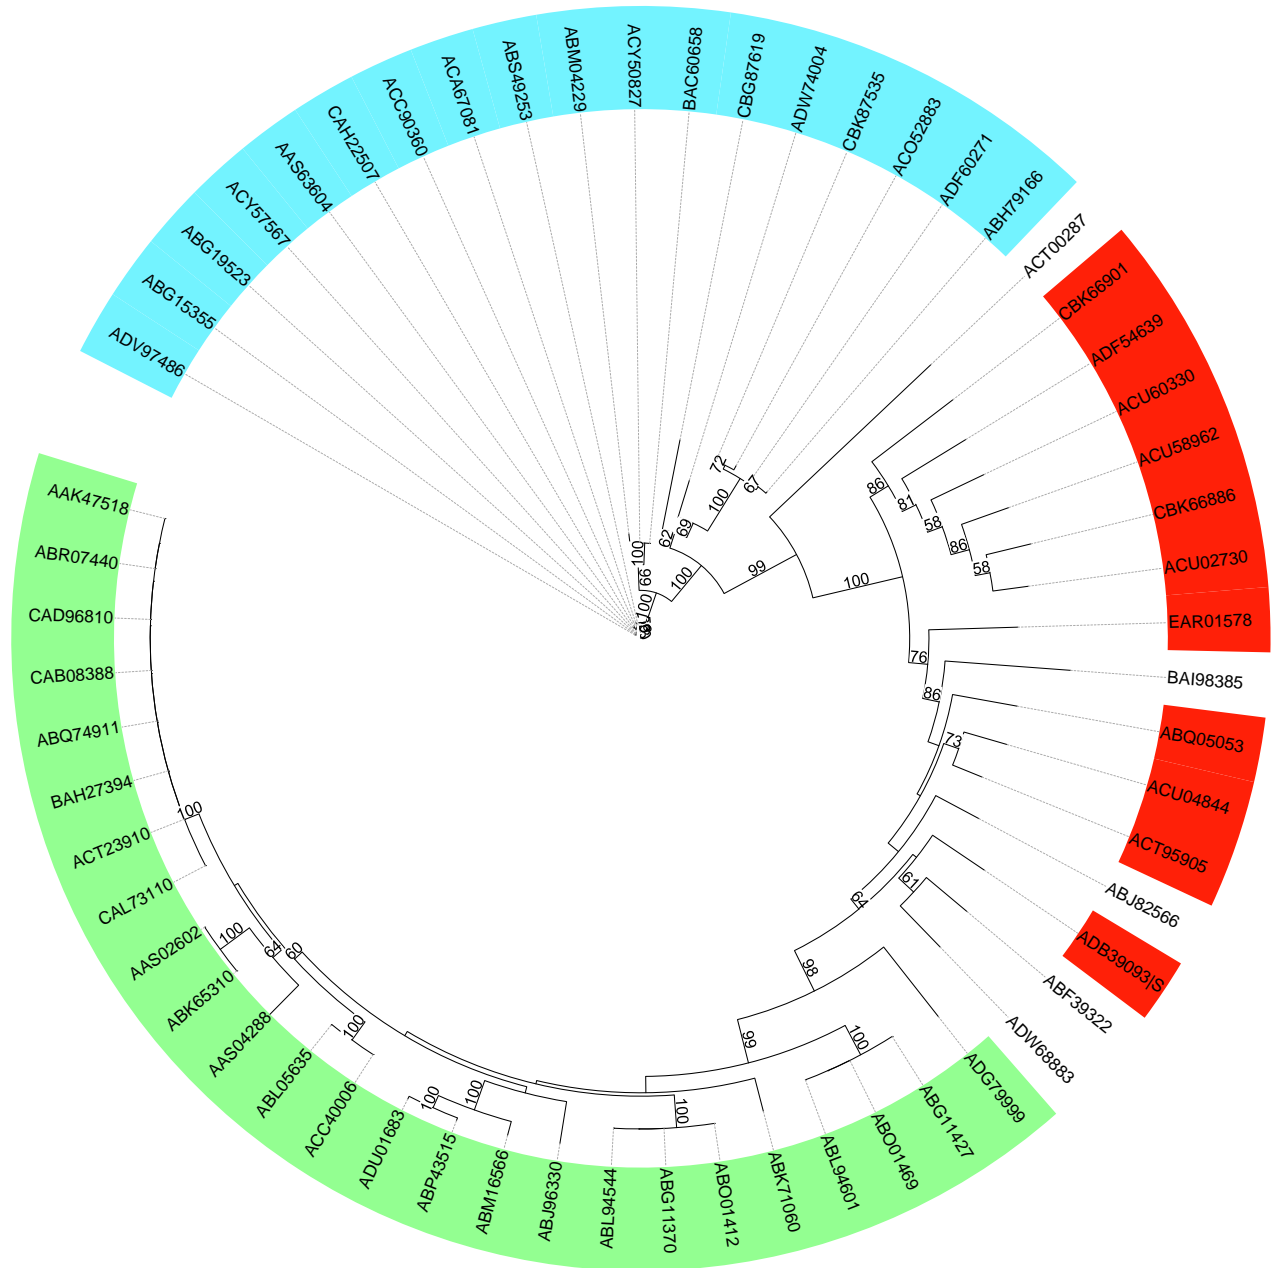

Figure GH5\_13:

Phylogenetic tree on subfamily GH5\_13 based on maximum likelihood with 100 bootstrap replications. Only the GH5 catalytic domain is used for the phylogenetic analysis. Bootstrap values > 50 are displayed. The green range marks sequences from Actinobacteria, whereas the red range marks sequences from Bacteroidetes, and the blue range marks sequences from Gammaproteobacteria. Bacterial sequences from other classes are displayed without color.

# Figure GH5\_14

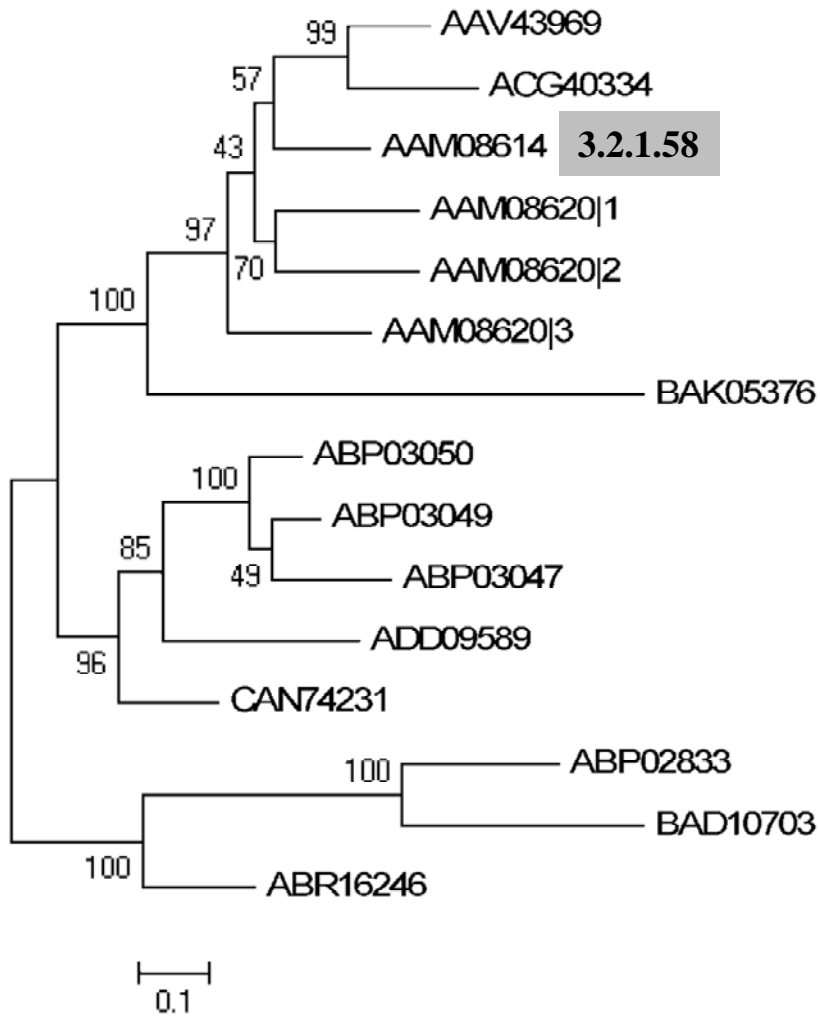

Figure GH5\_14:

Phylogenetic tree on subfamily GH5\_14 based on maximum likelihood with 100 bootstrap replications. Only the GH5 catalytic domain is used for the phylogenetic analysis. All bootstrap values are displayed.

# Figure GH5\_15

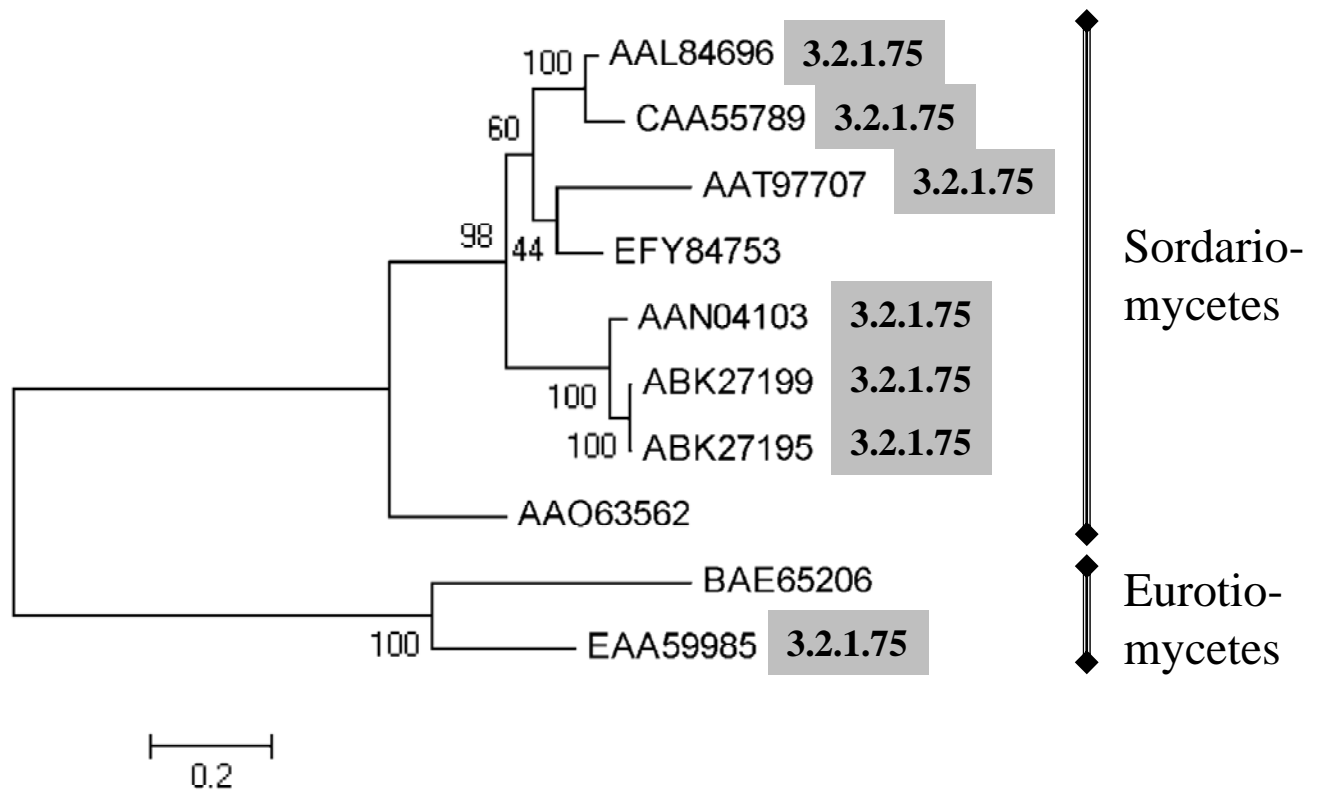

Figure GH5\_15:

Phylogenetic tree on subfamily GH5\_15 based on maximum likelihood with 100 bootstrap replications. Only the GH5 catalytic domain is used for the phylogenetic analysis. All bootstrap values are displayed.

# Figure GH5\_16

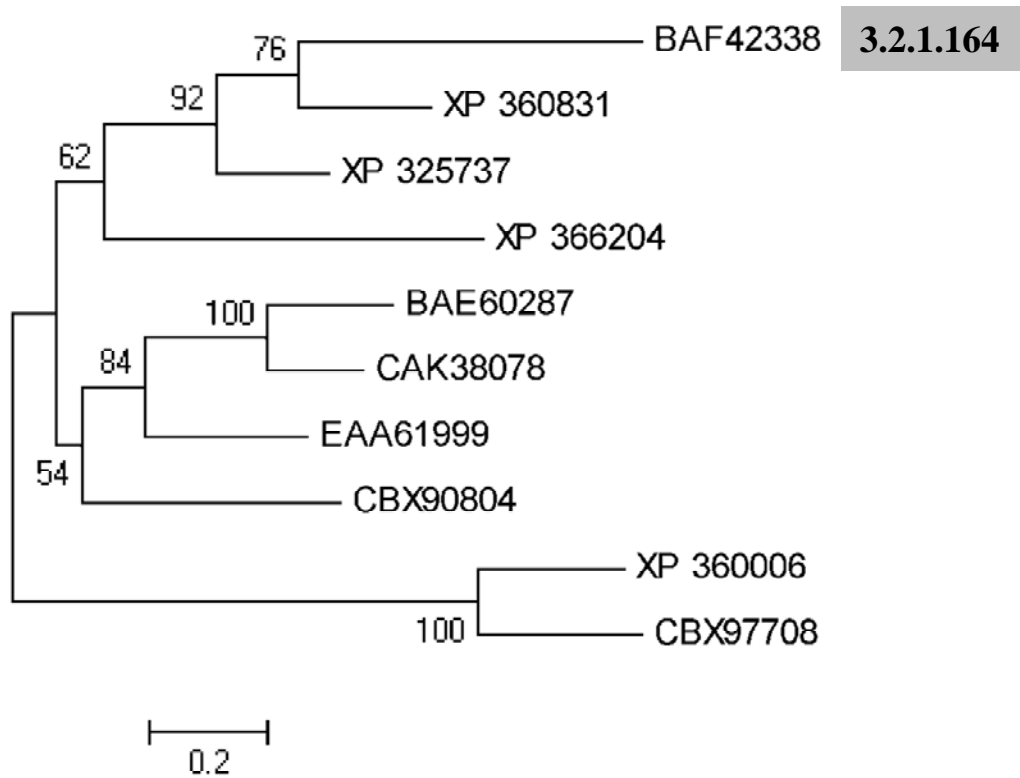

Figure GH5\_16:

Phylogenetic tree on subfamily GH5\_16 based on maximum likelihood with 100 bootstrap replications. Only the GH5 catalytic domain is used for the phylogenetic analysis. All bootstrap values are displayed.



## Figure GH5\_17

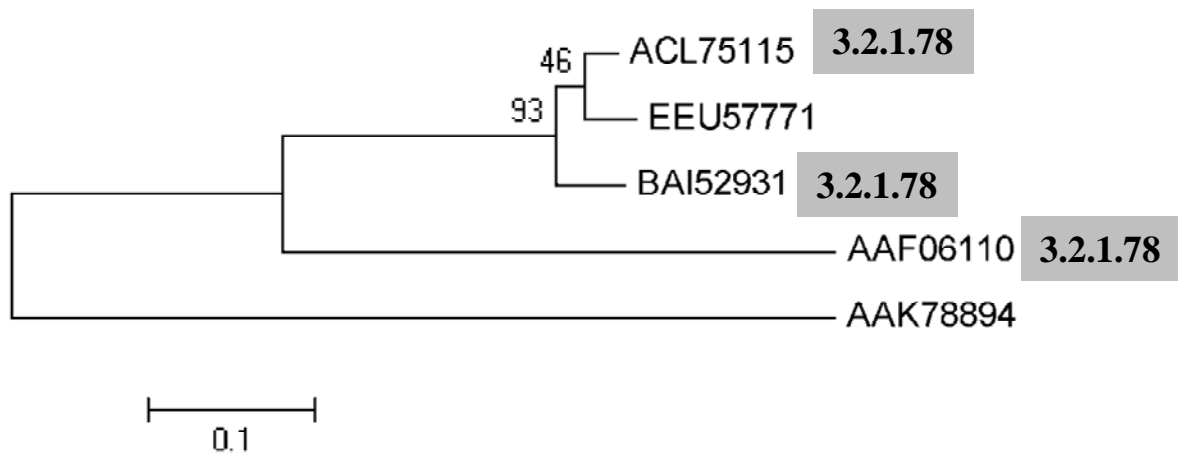

Figure GH5\_17:

Phylogenetic tree on subfamily GH5\_17 based on maximum likelihood with 100 bootstrap replications. Only the GH5 catalytic domain is used for the phylogenetic analysis. All bootstrap values are displayed.

# Figure GH5\_18

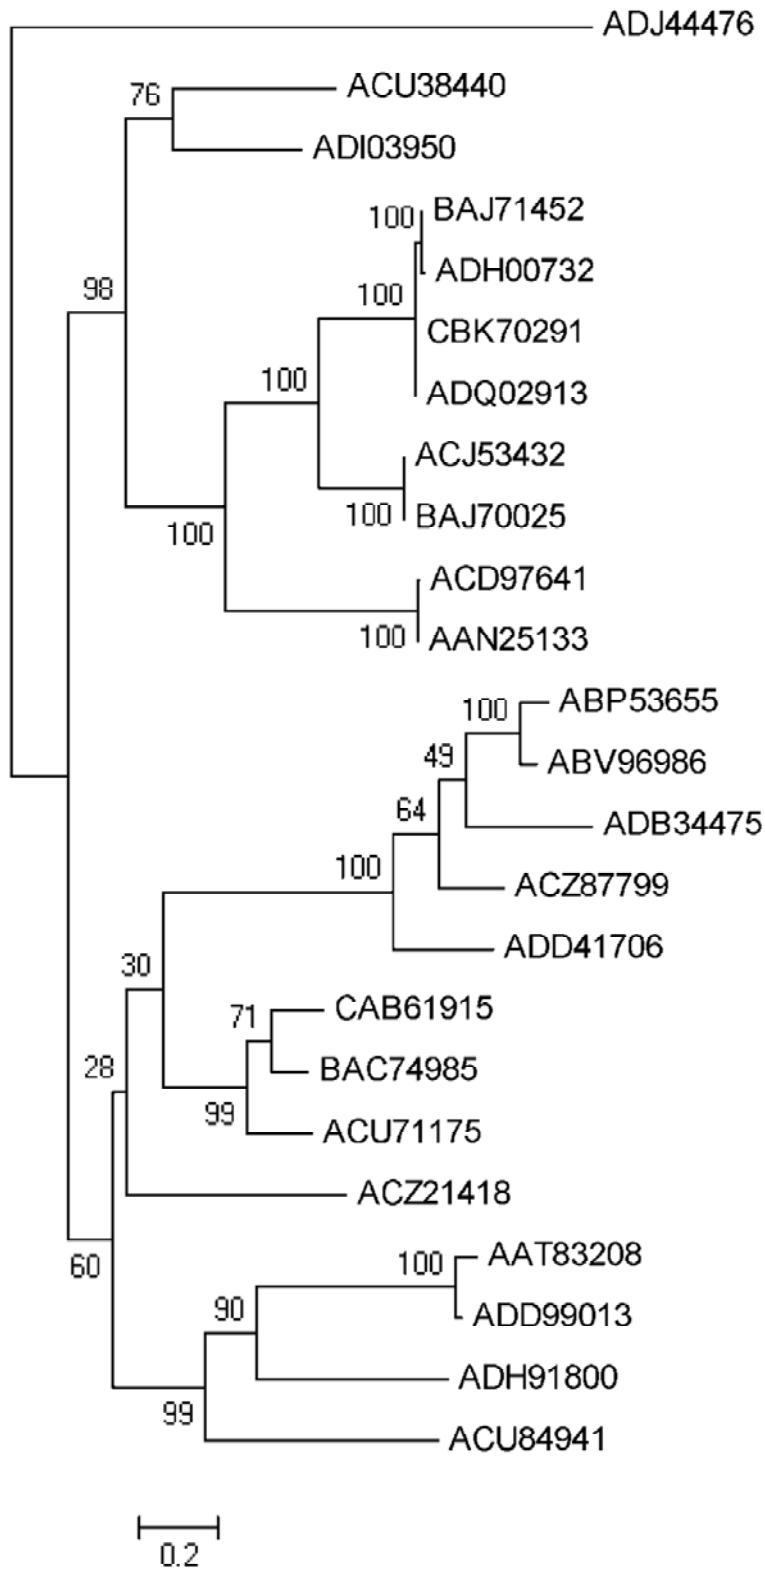

Figure GH5\_18:

Phylogenetic tree on subfamily GH5\_18 based on maximum likelihood with 100 bootstrap replications. Only the GH5 catalytic domain is used for the phylogenetic analysis. All bootstrap values are displayed.

**Figure GH5\_19**

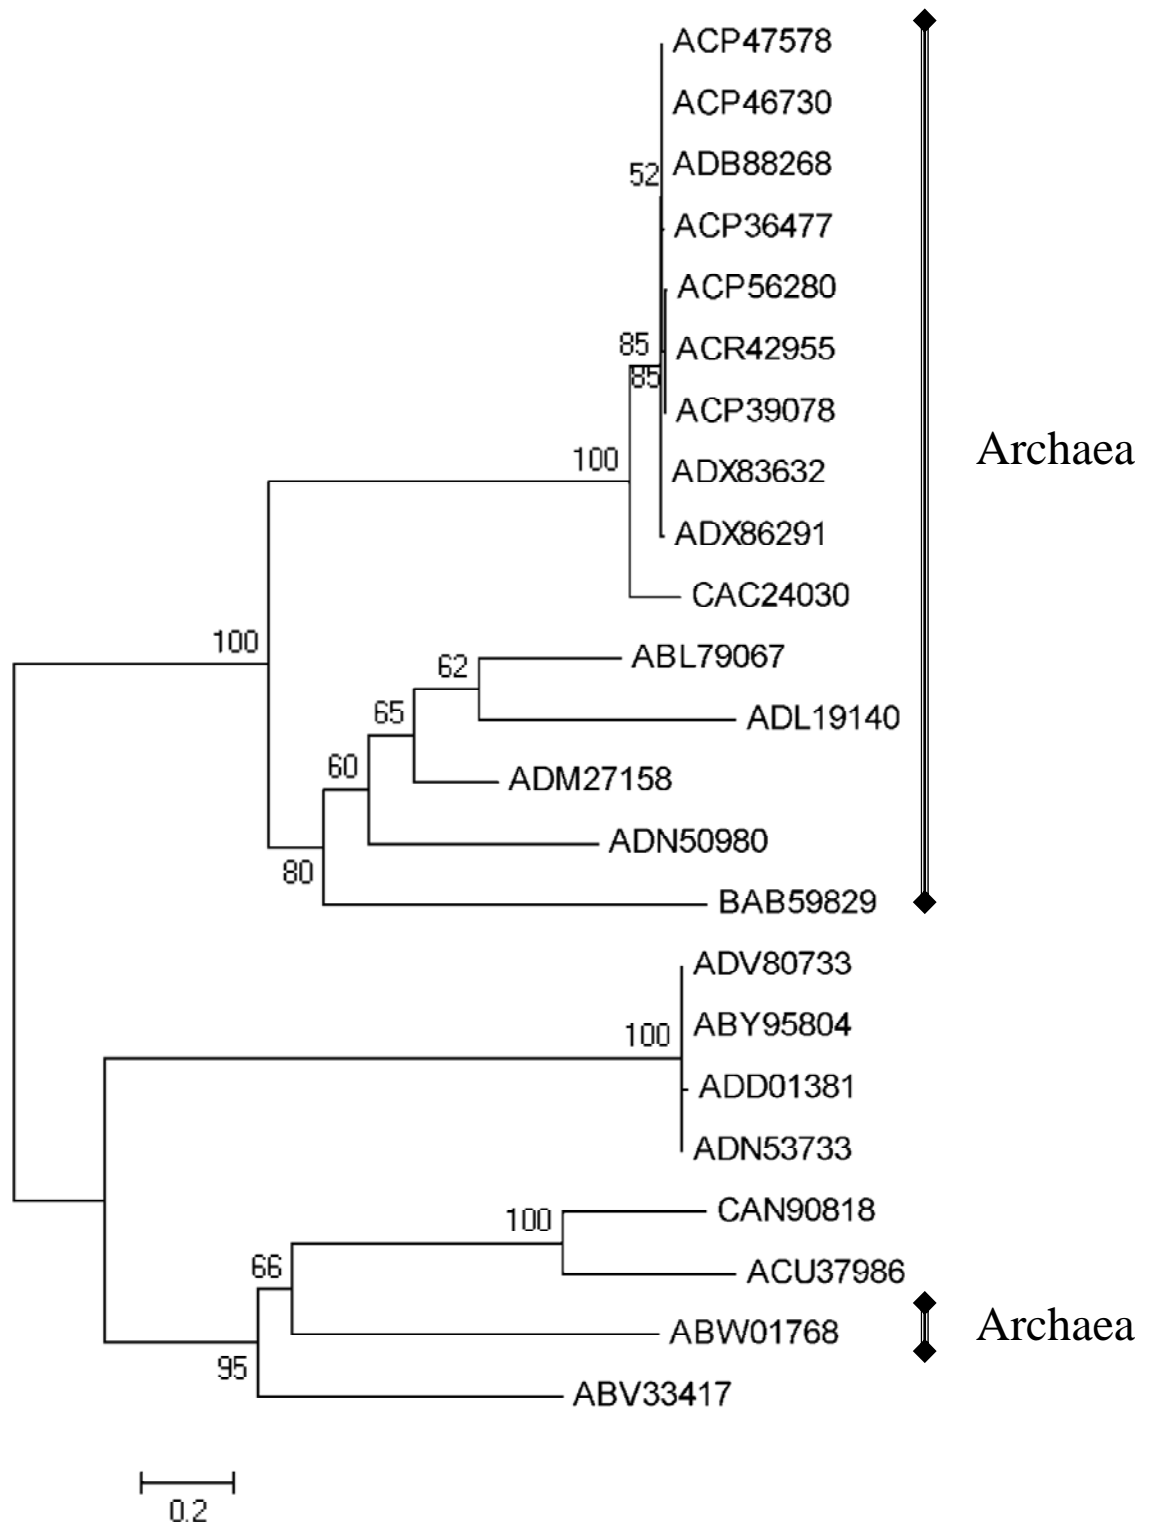

Figure GH5\_19:

Phylogenetic tree on subfamily GH5\_19 based on maximum likelihood with 100 bootstrap replications. Only the GH5 catalytic domain is used for the phylogenetic analysis. All bootstrap values are displayed.

# Figure GH5\_20

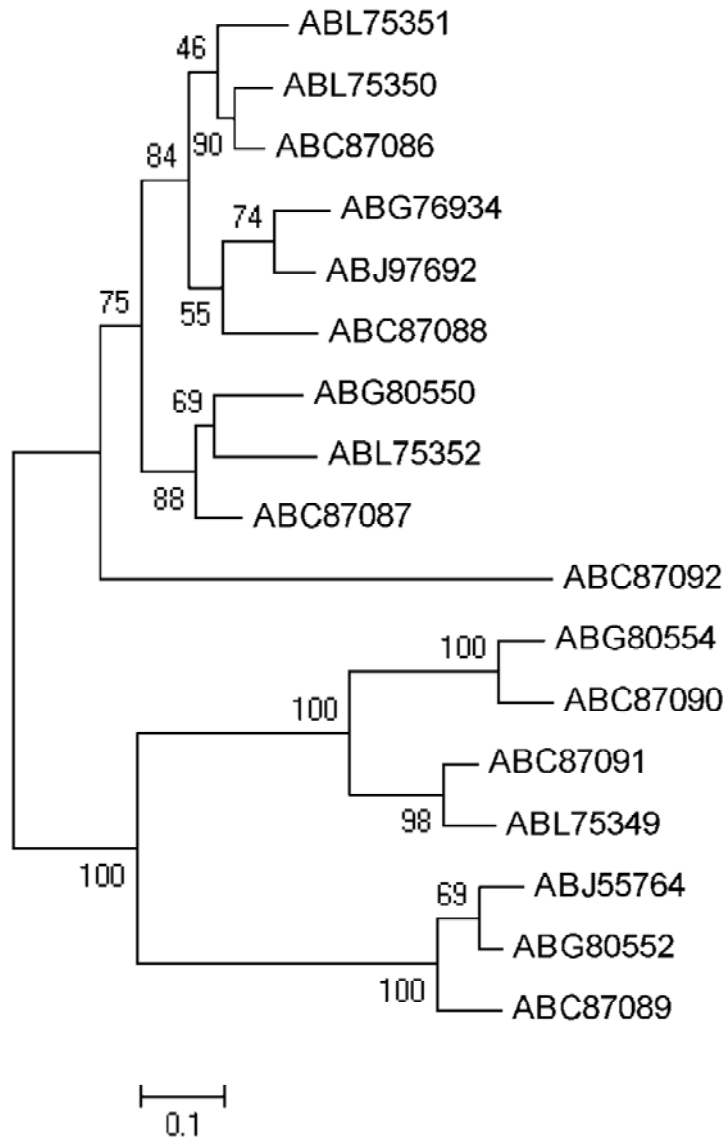

Figure GH5\_20:

Phylogenetic tree on subfamily GH5\_20 based on maximum likelihood with 100 bootstrap replications. Only the GH5 catalytic domain is used for the phylogenetic analysis. All bootstrap values are displayed.

# Figure GH5\_21

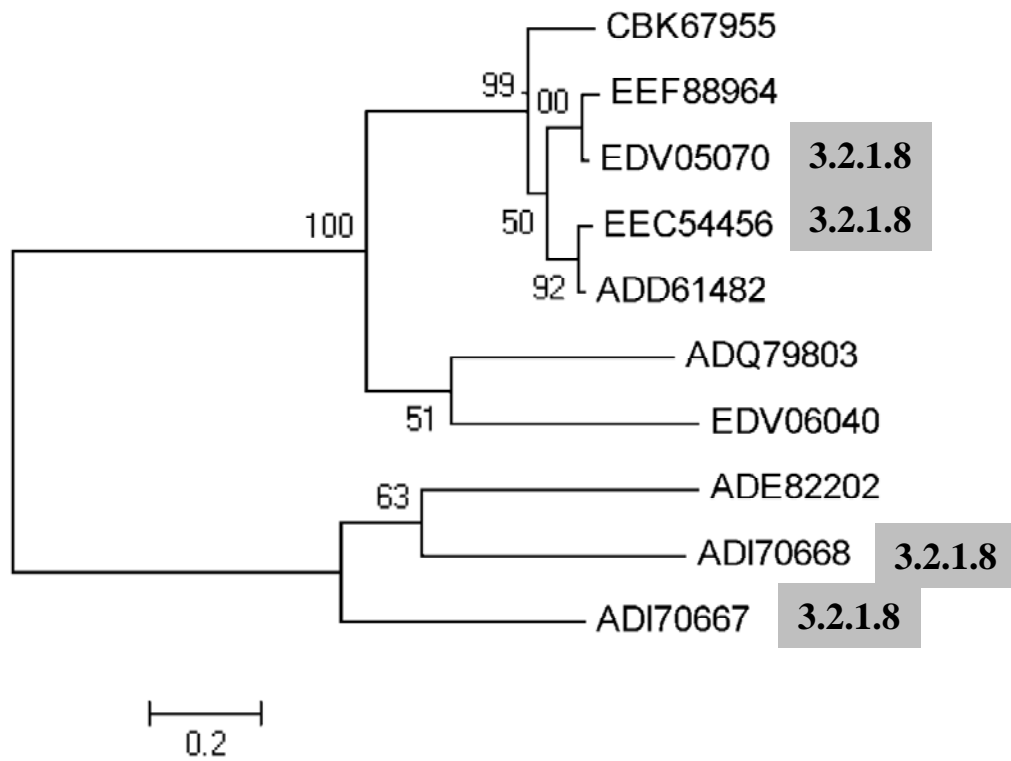

Figure GH5\_21:

Phylogenetic tree on subfamily GH5\_21 based on maximum likelihood with 100 bootstrap replications. Only the GH5 catalytic domain is used for the phylogenetic analysis. All bootstrap values are displayed.

**Figure GH5\_22**

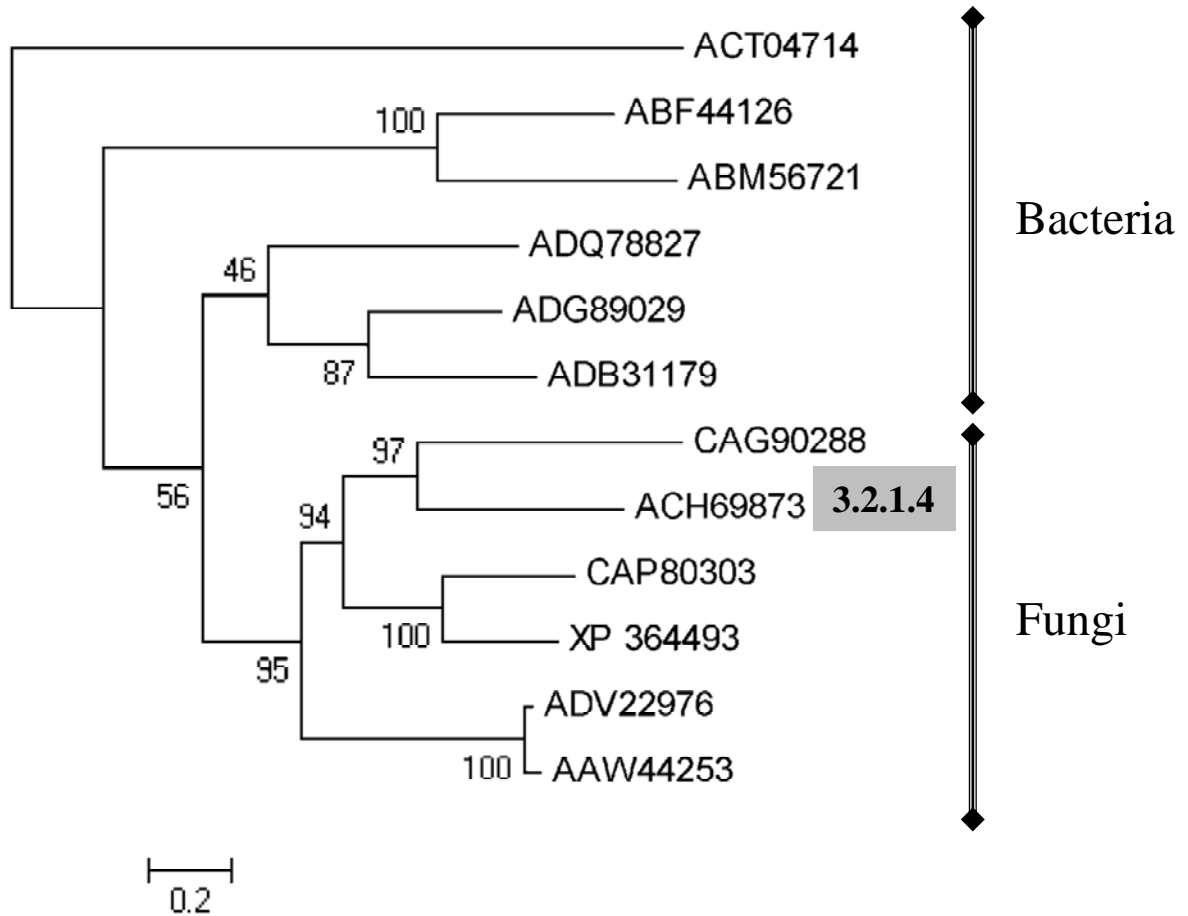

Figure GH5\_22:

Phylogenetic tree on subfamily GH5\_22 based on maximum likelihood with 100 bootstrap replications. Only the GH5 catalytic domain is used for the phylogenetic analysis. All bootstrap values are displayed.

# Figure GH5\_23

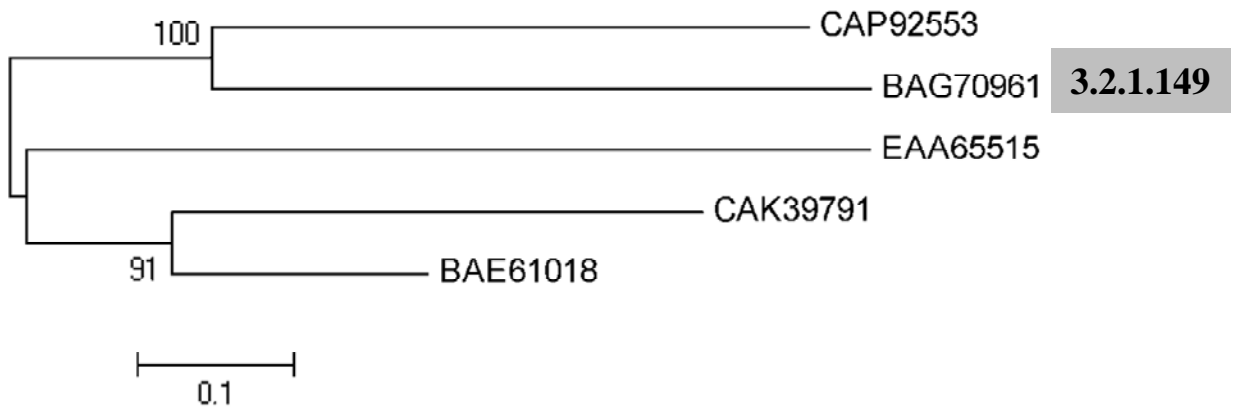

Figure GH5\_23:

Phylogenetic tree on subfamily GH5\_23 based on maximum likelihood with 100 bootstrap replications. Only the GH5 catalytic domain is used for the phylogenetic analysis. All bootstrap values are displayed.

# Figure GH5\_24

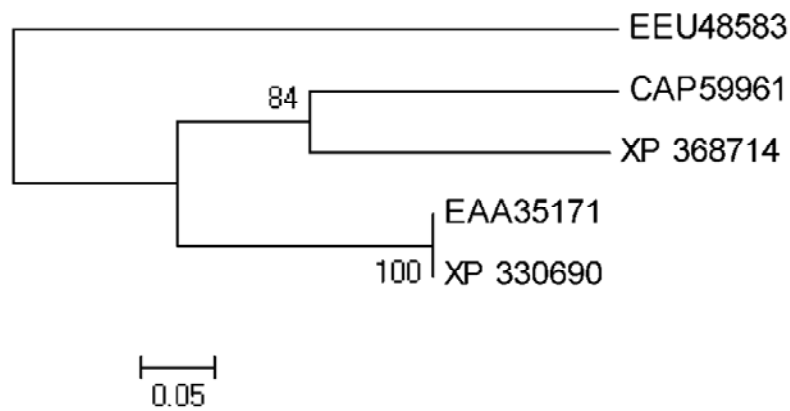

Figure GH5\_24:

Phylogenetic tree on subfamily GH5\_24 based on maximum likelihood with 100 bootstrap replications. Only the GH5 catalytic domain is used for the phylogenetic analysis. All bootstrap values are displayed.



**Figure GH5\_25**

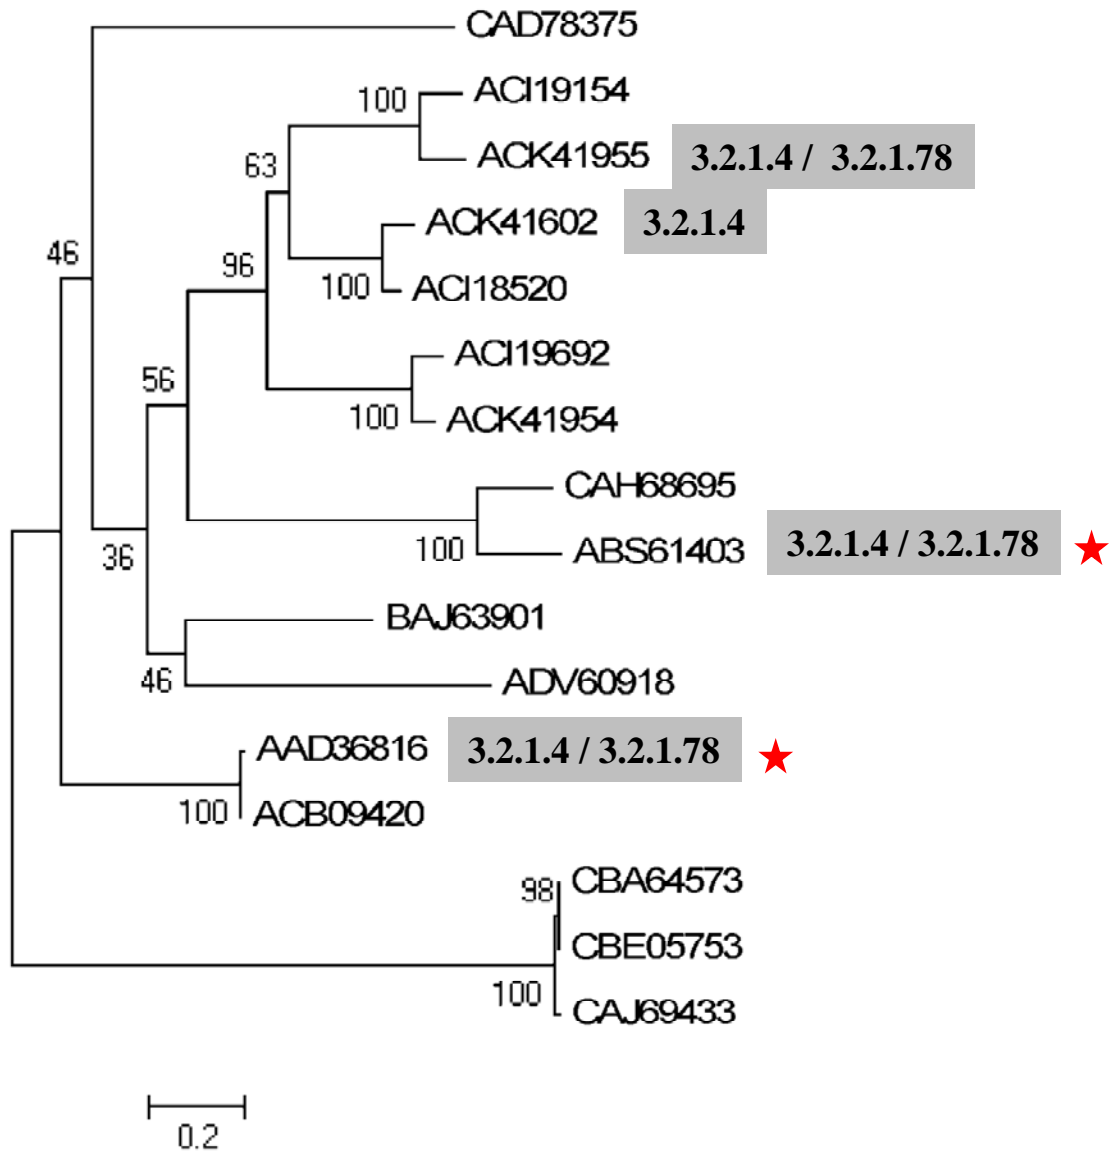

Figure GH5\_25:

Phylogenetic tree on subfamily GH5\_25 based on maximum likelihood with 100 bootstrap replications. Only the GH5 catalytic domain is used for the phylogenetic analysis. All bootstrap values are displayed. The enzymes with a solved 3-D structure are marked with a red star.

# Figure GH5\_26

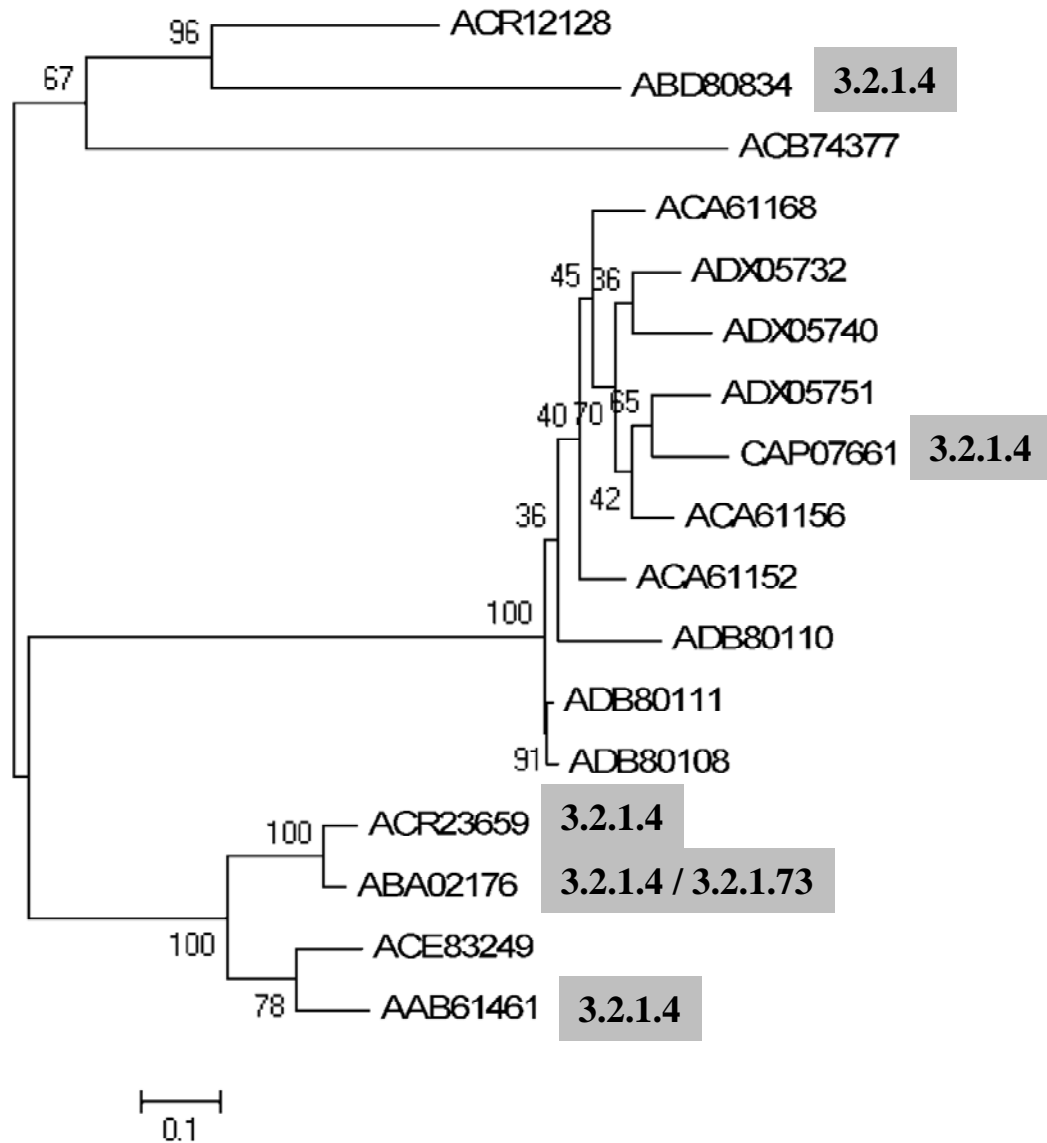

Figure GH5\_26:

Phylogenetic tree on subfamily GH5\_26 based on maximum likelihood with 100 bootstrap replications. Only the GH5 catalytic domain is used for the phylogenetic analysis. All bootstrap values are displayed.

# Figure GH5\_27

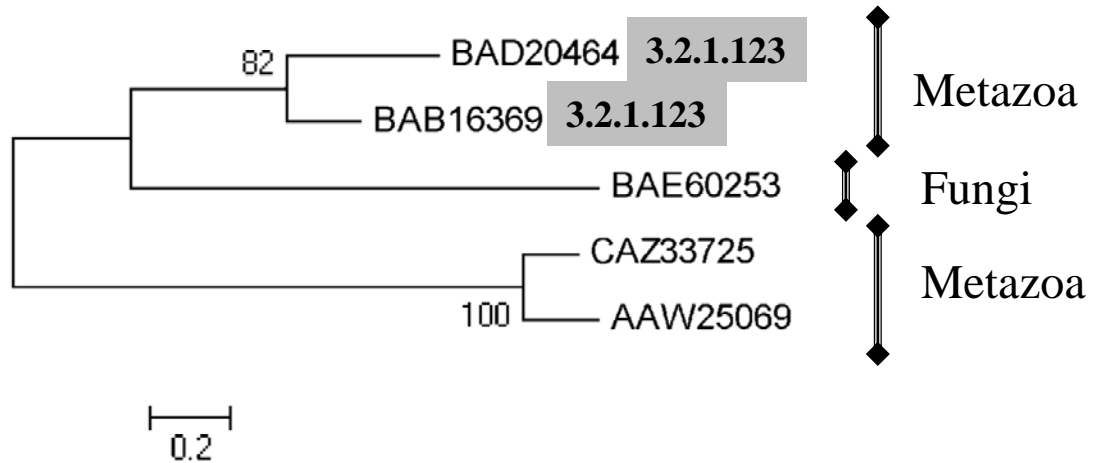

Figure GH5\_27:

Phylogenetic tree on subfamily GH5\_27 based on maximum likelihood with 100 bootstrap replications. Only the GH5 catalytic domain is used for the phylogenetic analysis. All bootstrap values are displayed.

# Figure GH5\_28

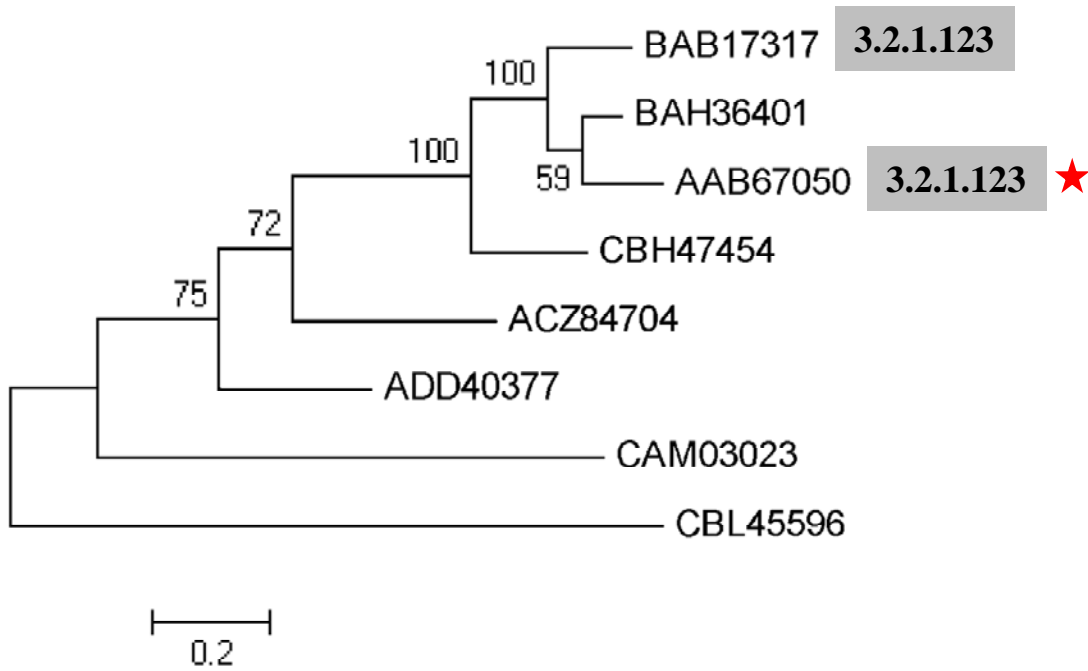

Figure GH5\_28:

Phylogenetic tree on subfamily GH5\_28 based on maximum likelihood with 100 bootstrap replications. Only the GH5 catalytic domain is used for the phylogenetic analysis. All bootstrap values are displayed. The only enzymes with a solved 3-D structure is marked with a red star.

## Figure GH5\_29

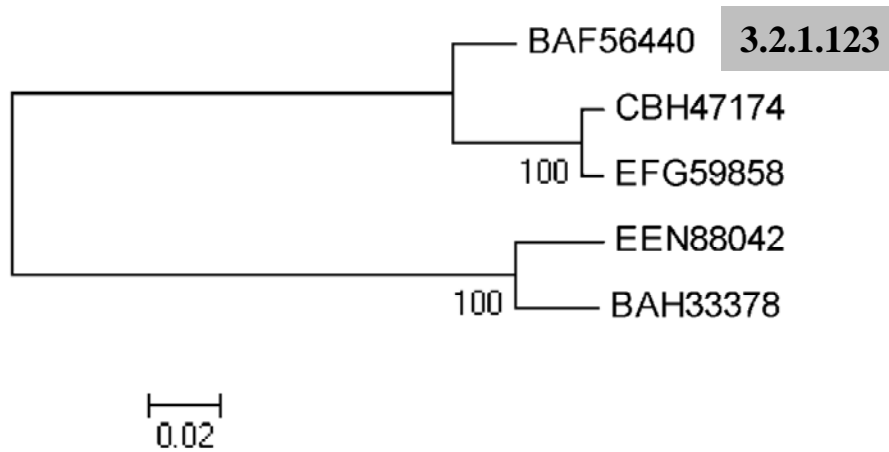

Figure GH5\_29:

Phylogenetic tree on subfamily GH5\_29 based on maximum likelihood with 100 bootstrap replications. Only the GH5 catalytic domain is used for the phylogenetic analysis. All bootstrap values are displayed.

# Figure GH5\_30

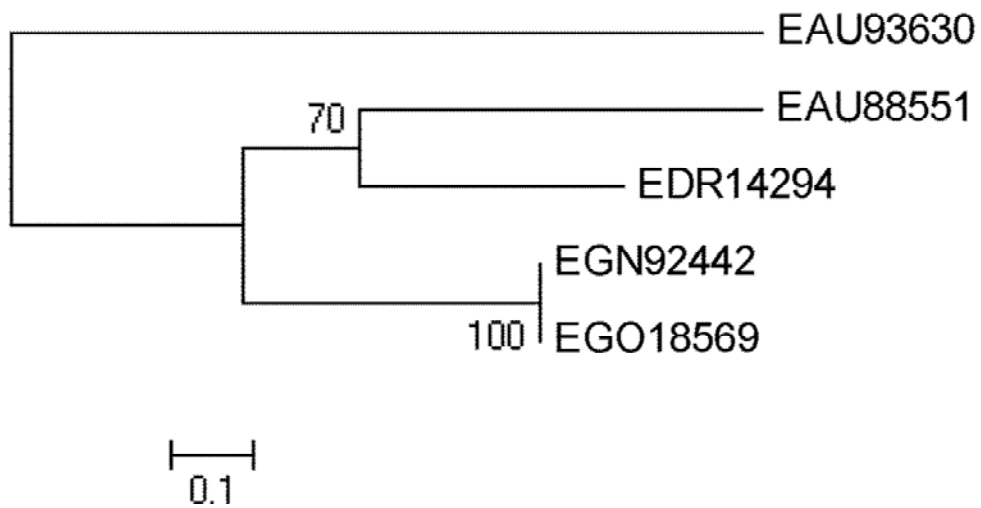

Figure GH5\_30:

Phylogenetic tree on subfamily GH5\_30 based on maximum likelihood with 100 bootstrap replications. Only the GH5 catalytic domain is used for the phylogenetic analysis. All bootstrap values are displayed.

# Figure GH5\_31

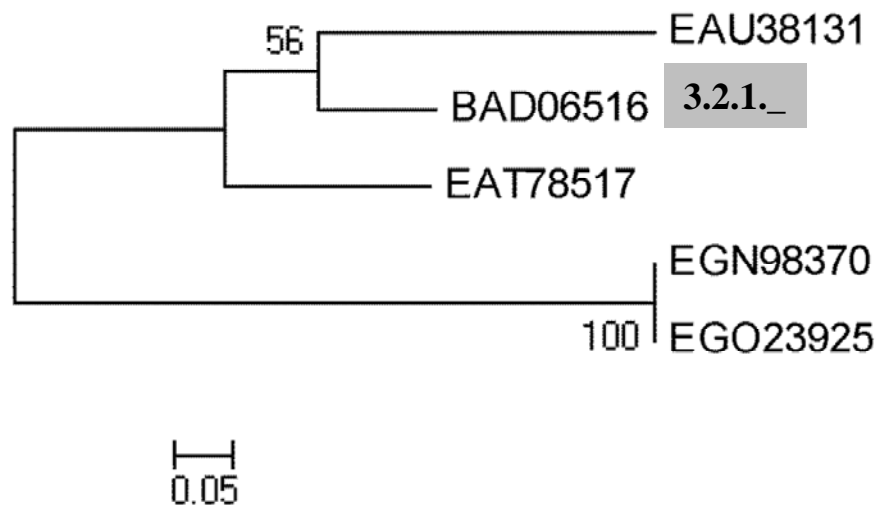

Figure GH5\_31:

Phylogenetic tree on subfamily GH5\_31 based on maximum likelihood with 100 bootstrap replications. Only the GH5 catalytic domain is used for the phylogenetic analysis. All bootstrap values are displayed.

# Figure GH5\_32

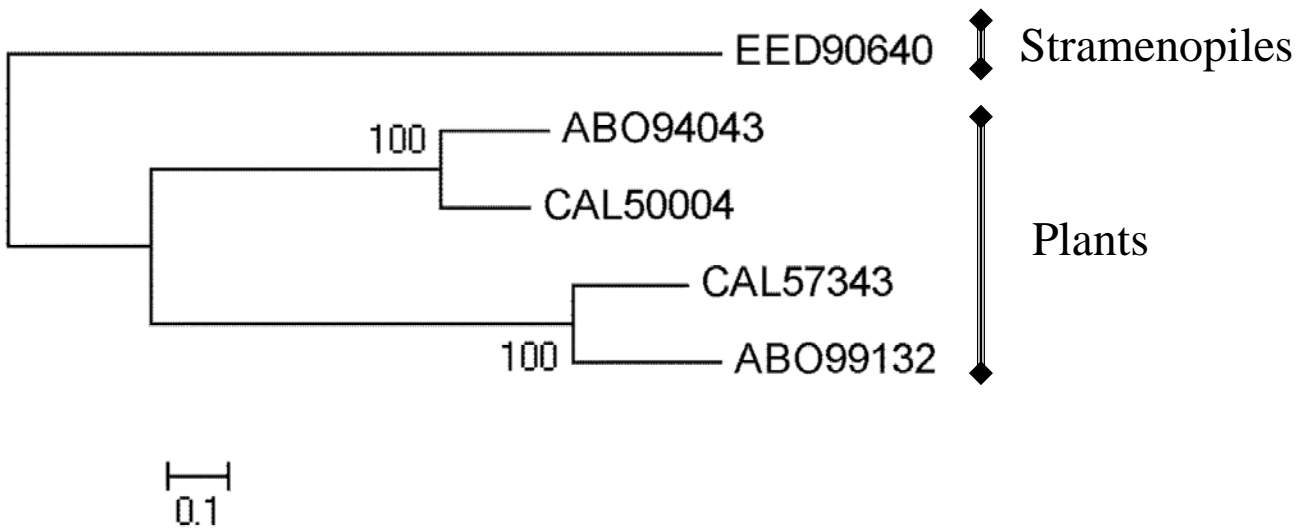

Figure GH5\_32:

Phylogenetic tree on subfamily GH5\_32 based on maximum likelihood with 100 bootstrap replications. Only the GH5 catalytic domain is used for the phylogenetic analysis. All bootstrap values are displayed.



**Figure GH5\_33**

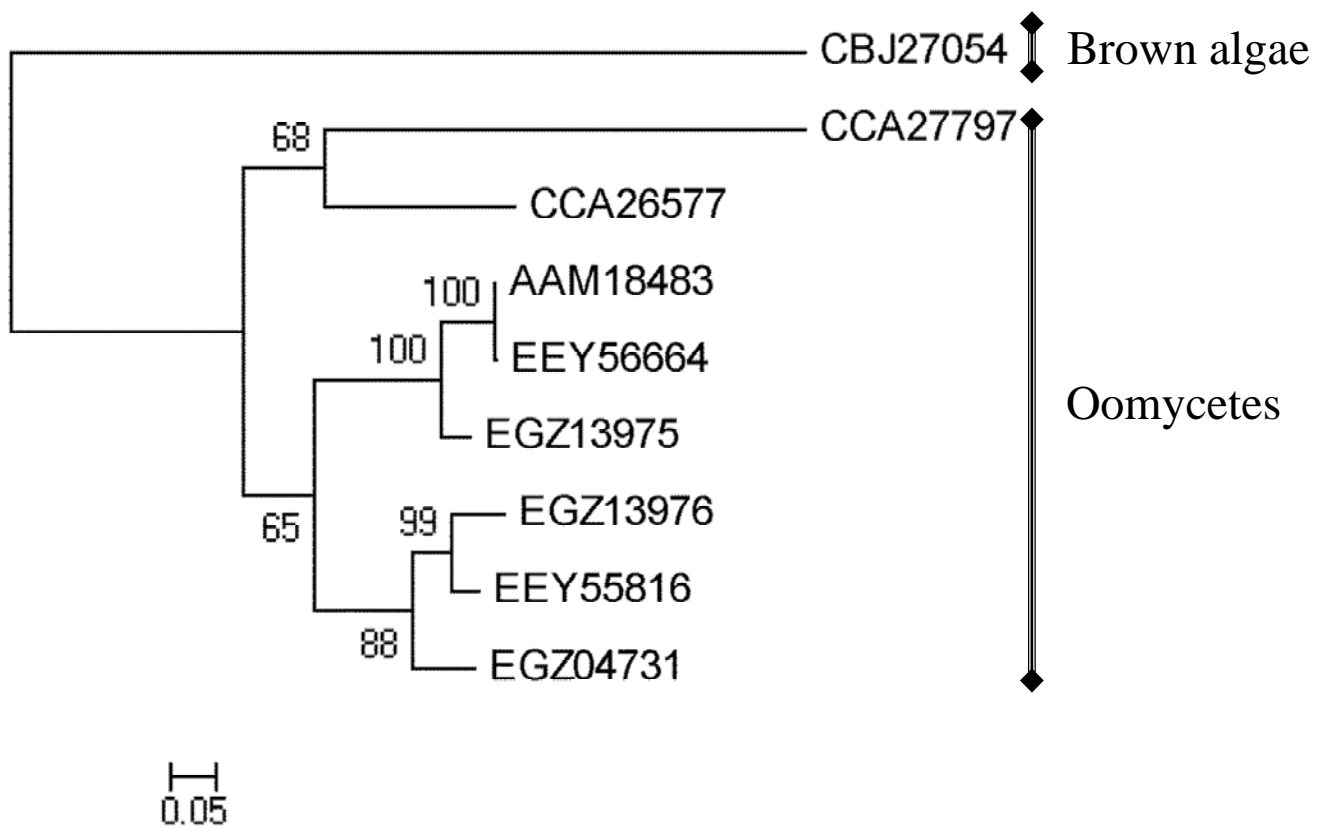

Figure GH5\_33:

Phylogenetic tree on subfamily GH5\_33 based on maximum likelihood with 100 bootstrap replications. Only the GH5 catalytic domain is used for the phylogenetic analysis. All bootstrap values are displayed.

# Figure GH5\_34

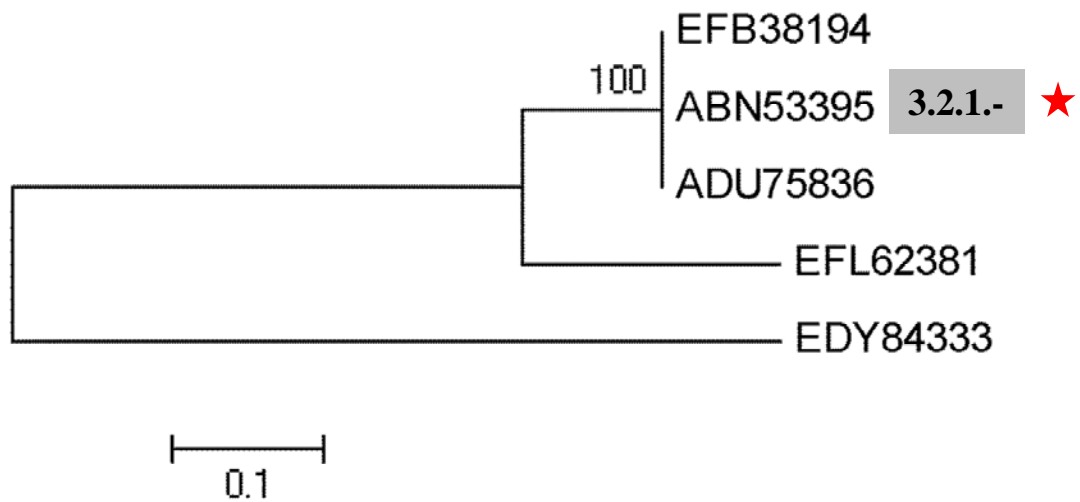

Figure GH5\_34:

Phylogenetic tree on subfamily GH5\_34 based on maximum likelihood with 100 bootstrap replications. Only the GH5 catalytic domain is used for the phylogenetic analysis. All bootstrap values are displayed. The only enzyme with a solved 3-D structure is marked with a red star.

# Figure GH5\_35

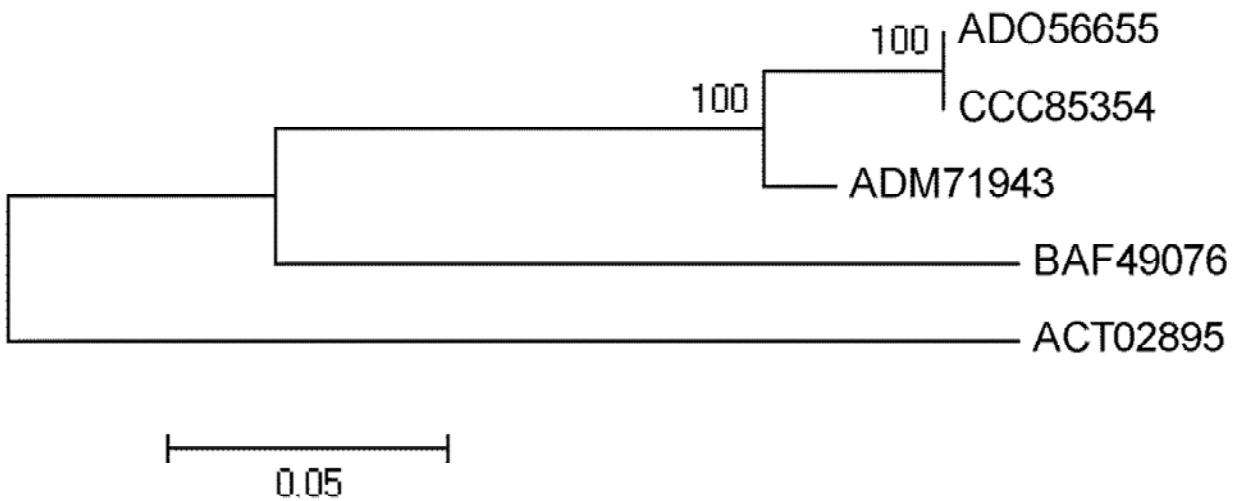

Figure GH5\_35:

Phylogenetic tree on subfamily GH5\_35 based on maximum likelihood with 100 bootstrap replications. Only the GH5 catalytic domain is used for the phylogenetic analysis. All bootstrap values are displayed.

# Figure GH5\_36

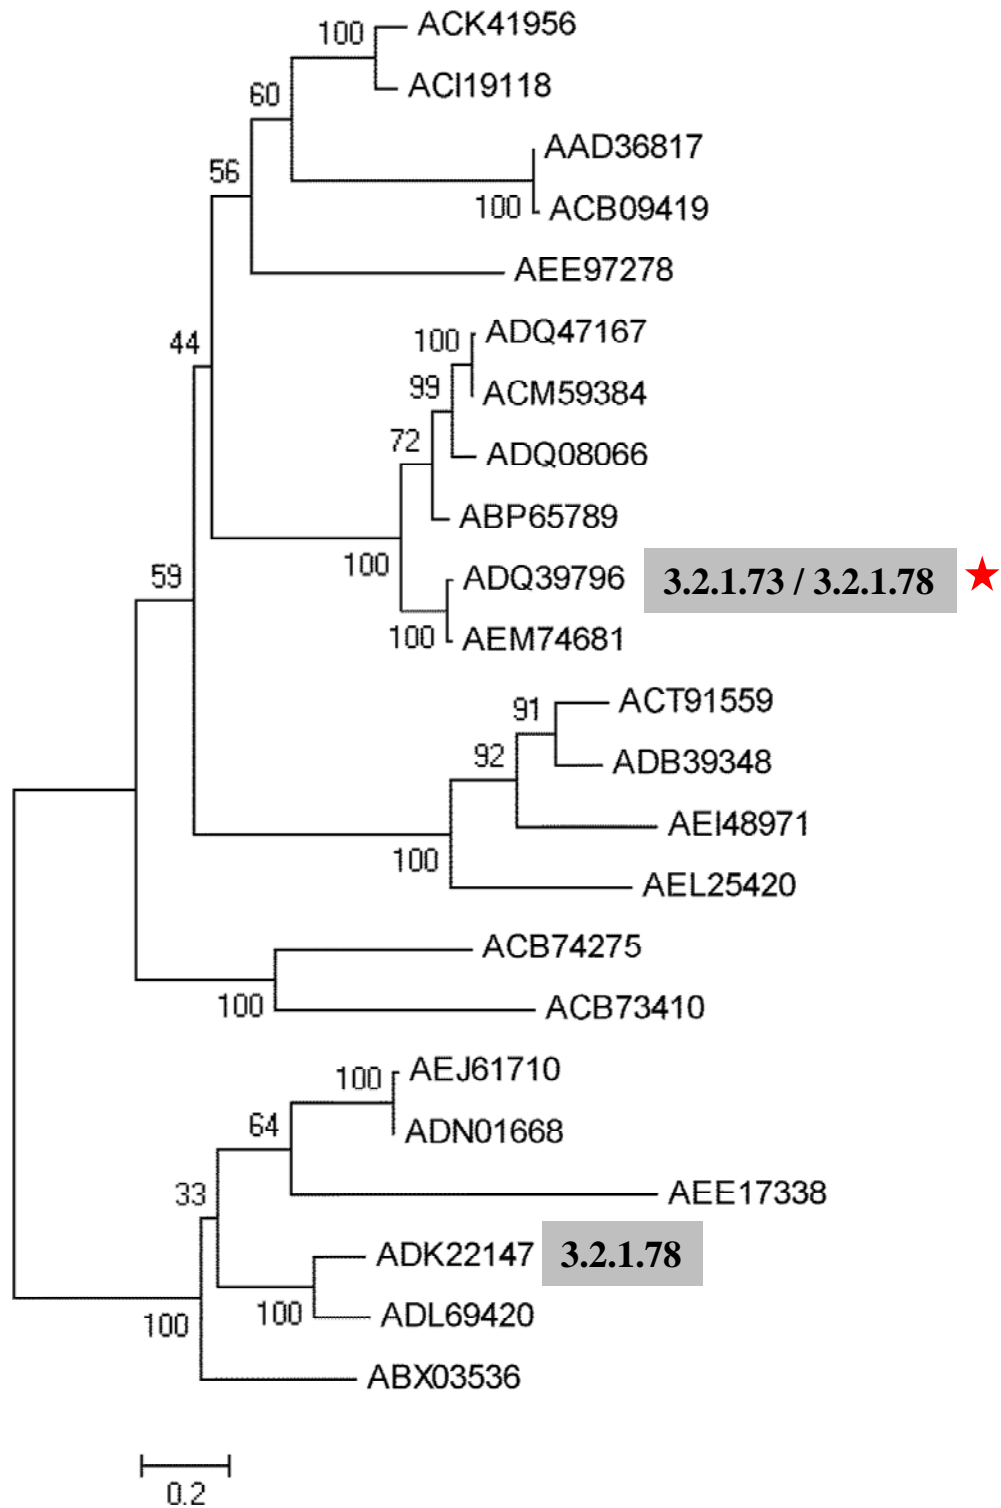

Figure GH5\_36:

Phylogenetic tree on subfamily GH5\_36 based on maximum likelihood with 100 bootstrap replications. Only the GH5 catalytic domain is used for the phylogenetic analysis. All bootstrap values are displayed. The only enzyme with a solved 3-D structure is marked with a red star.

**Figure GH5\_37**

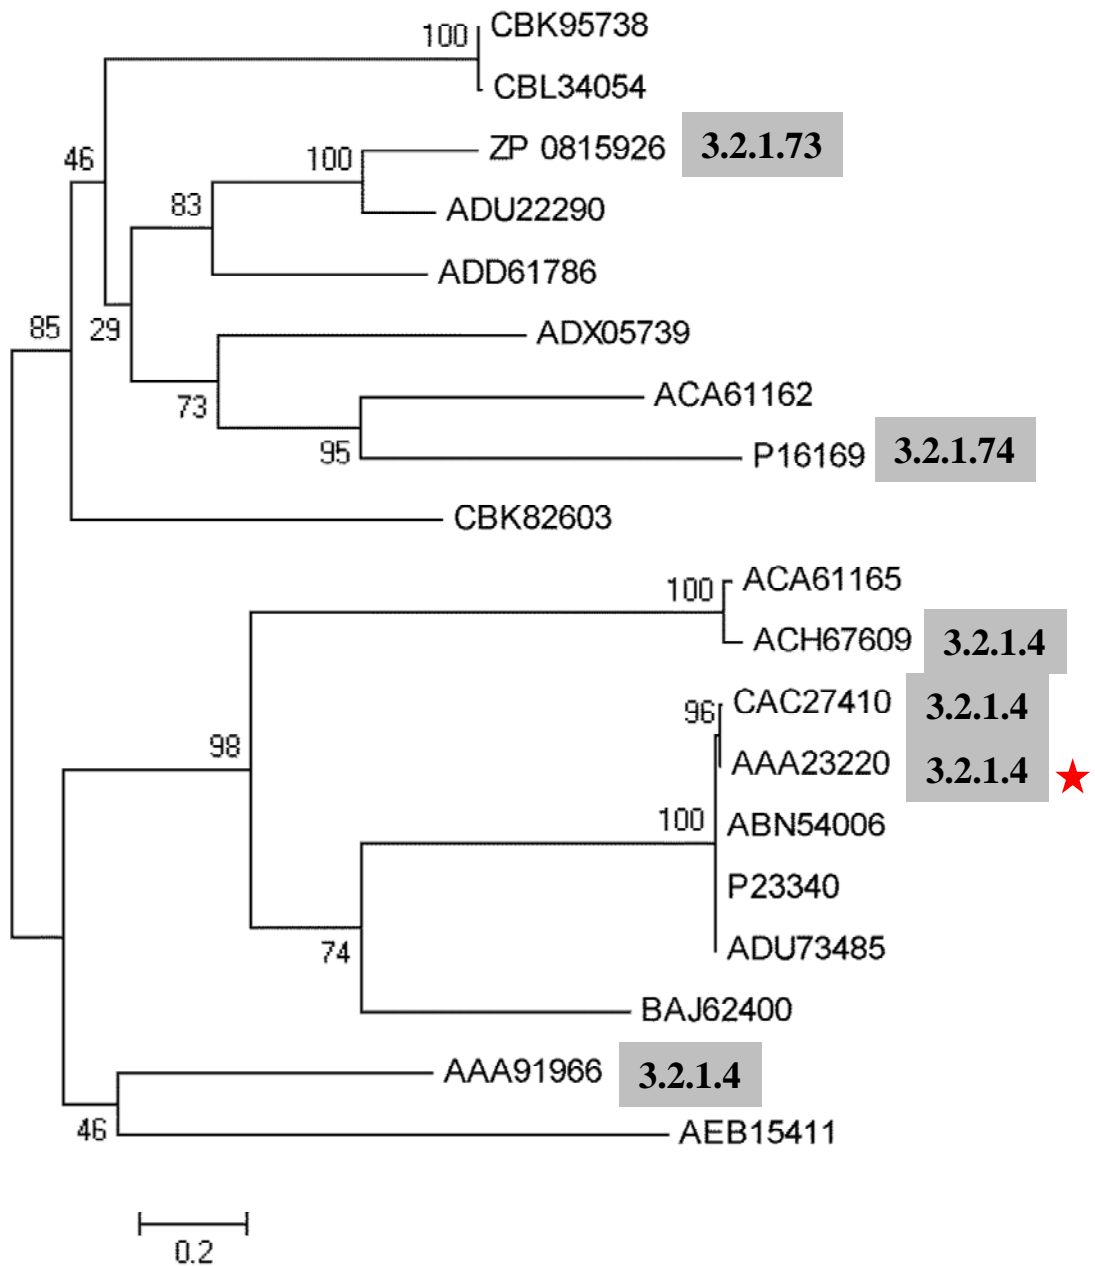

Figure GH5\_37:

Phylogenetic tree on subfamily GH5\_37 based on maximum likelihood with 100 bootstrap replications. Only the GH5 catalytic domain is used for the phylogenetic analysis. All bootstrap values are displayed. The only enzyme with a solved 3-D structure is marked with a red star.

# Figure GH5\_38

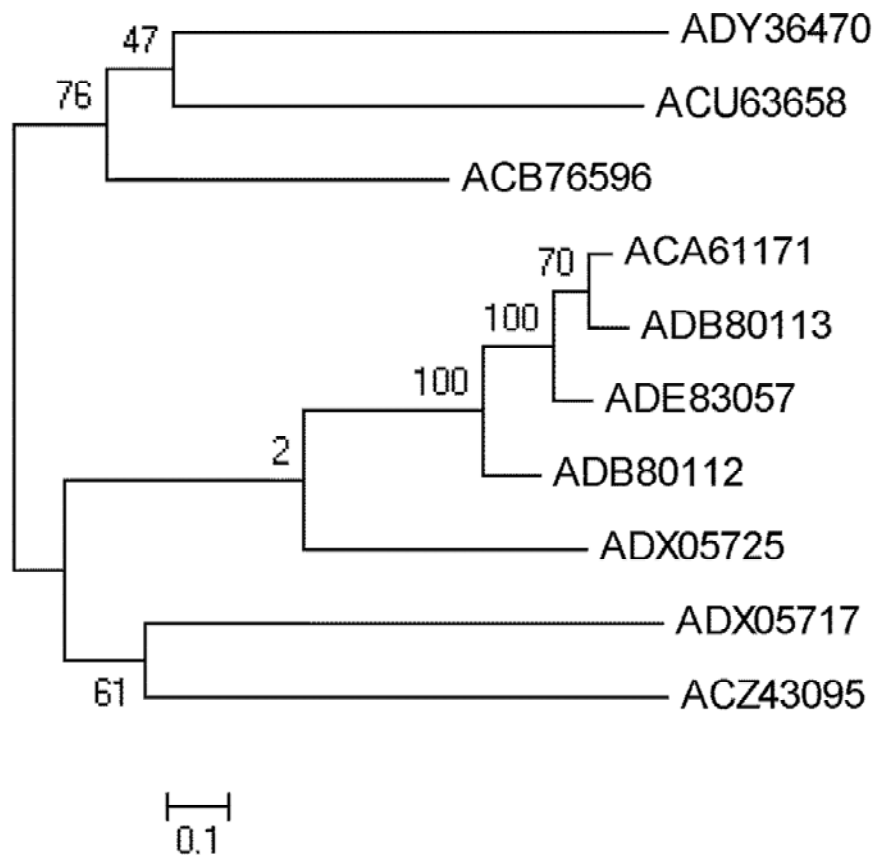

Figure GH5\_38:

Phylogenetic tree on subfamily GH5\_38 based on maximum likelihood with 100 bootstrap replications. Only the GH5 catalytic domain is used for the phylogenetic analysis. All bootstrap values are displayed.

# Figure GH5\_39

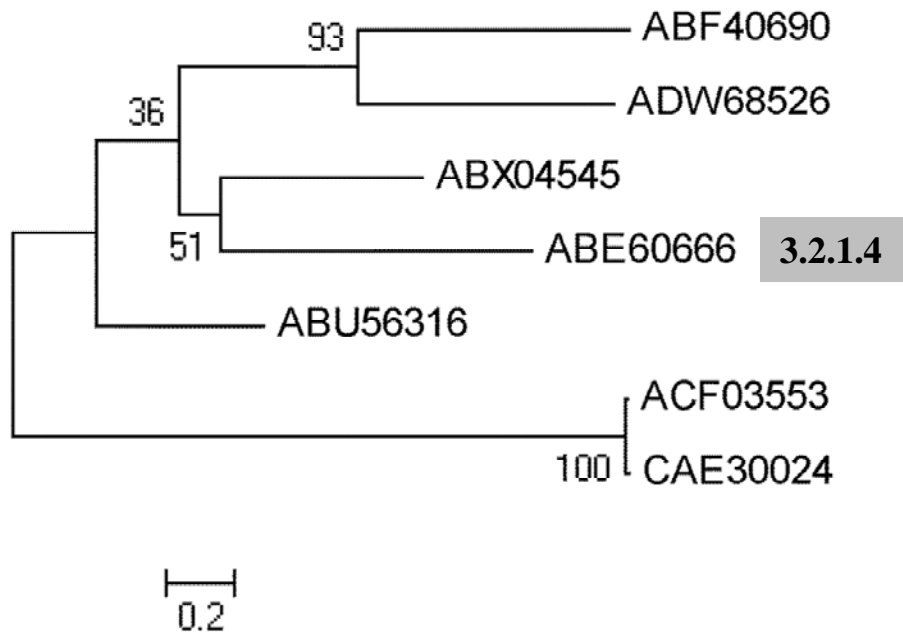

Figure GH5\_39:

Phylogenetic tree on subfamily GH5\_39 based on maximum likelihood with 100 bootstrap replications. Only the GH5 catalytic domain is used for the phylogenetic analysis. All bootstrap values are displayed.

# Figure GH5\_40

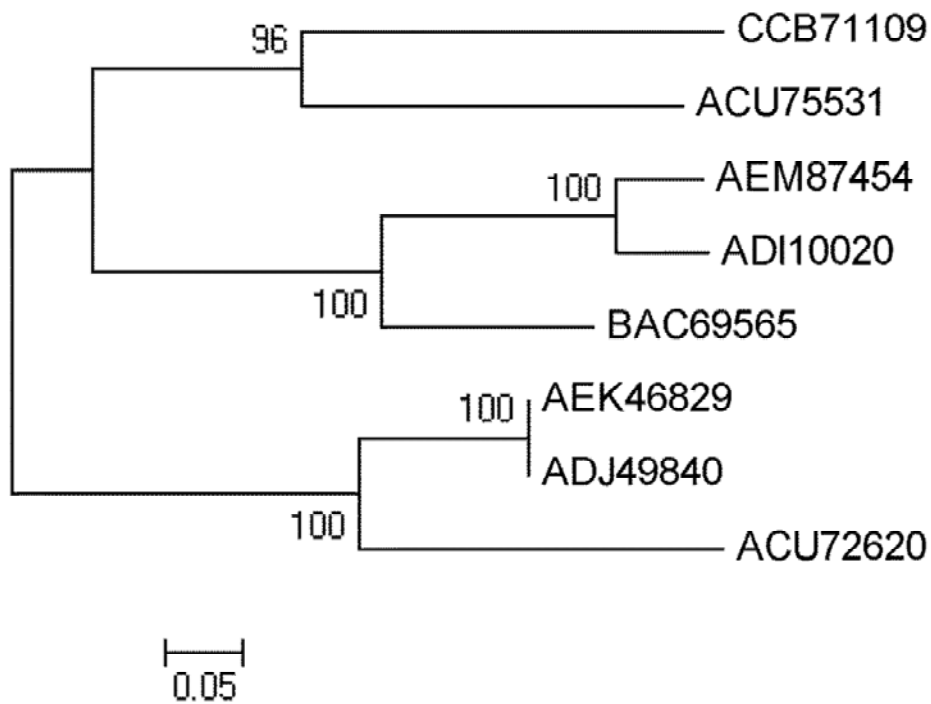

Figure GH5\_40:

Phylogenetic tree on subfamily GH5\_40 based on maximum likelihood with 100 bootstrap replications. Only the GH5 catalytic domain is used for the phylogenetic analysis. All bootstrap values are displayed.



# Figure GH5\_41

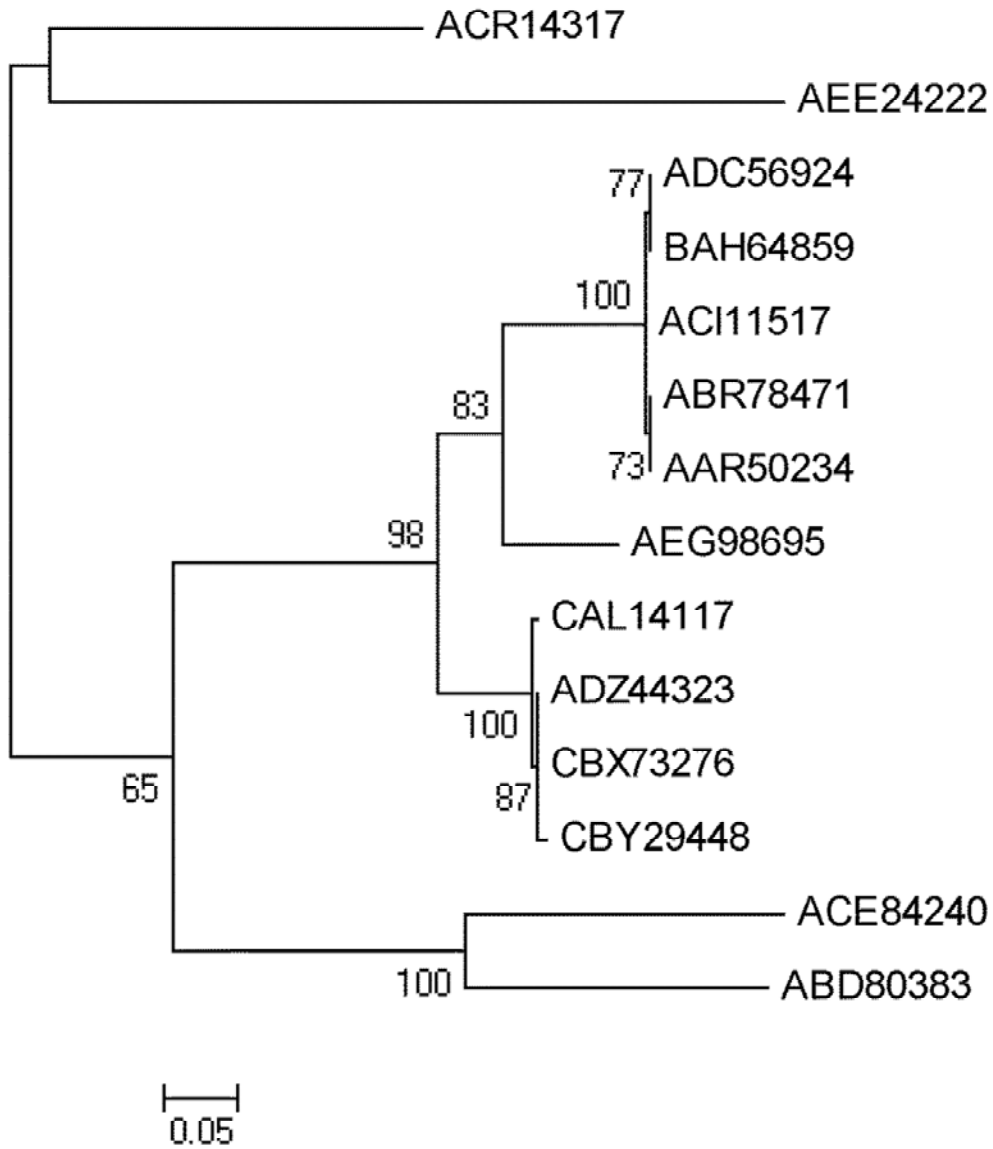

Figure GH5\_41:

Phylogenetic tree on subfamily GH5\_41 based on maximum likelihood with 100 bootstrap replications. Only the GH5 catalytic domain is used for the phylogenetic analysis. All bootstrap values are displayed.

**Figure GH5\_42**

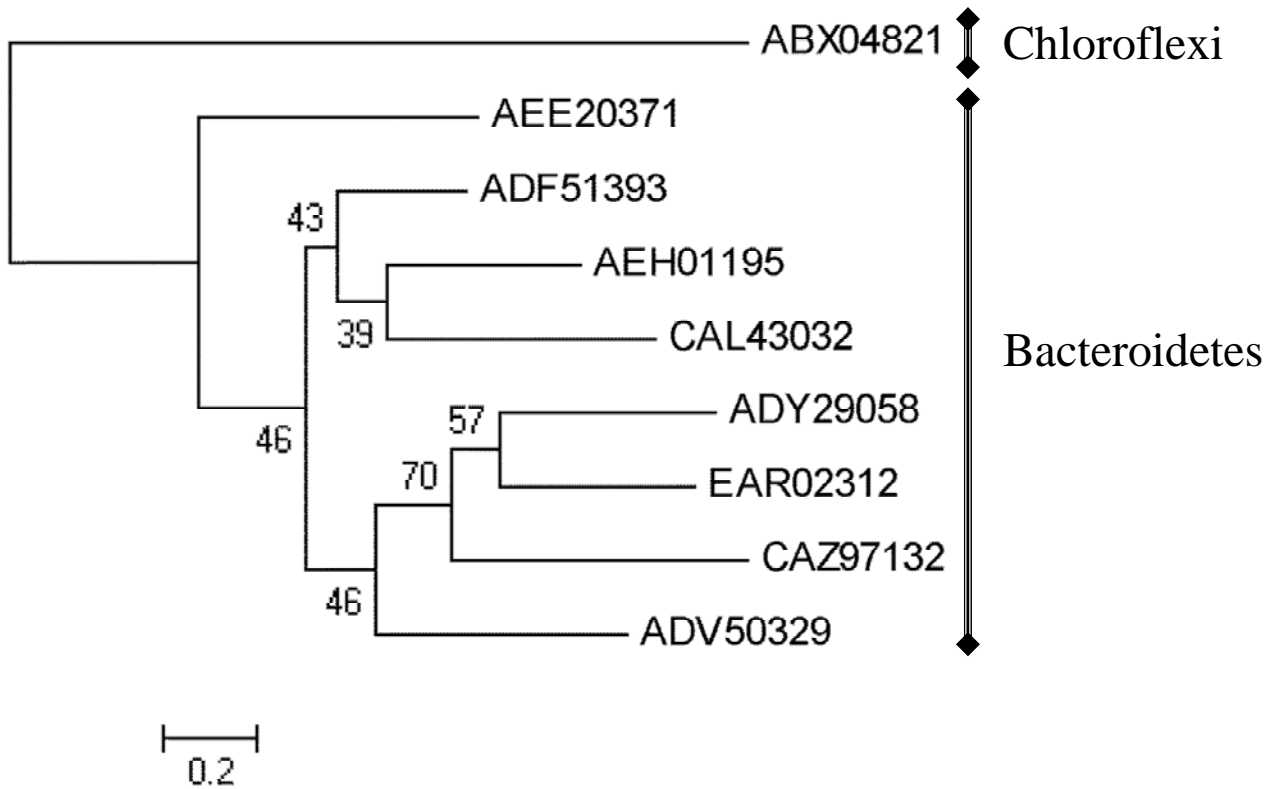

Figure GH5\_42:

Phylogenetic tree on subfamily GH5\_42 based on maximum likelihood with 100 bootstrap replications. Only the GH5 catalytic domain is used for the phylogenetic analysis. All bootstrap values are displayed.

**Figure GH5\_43**

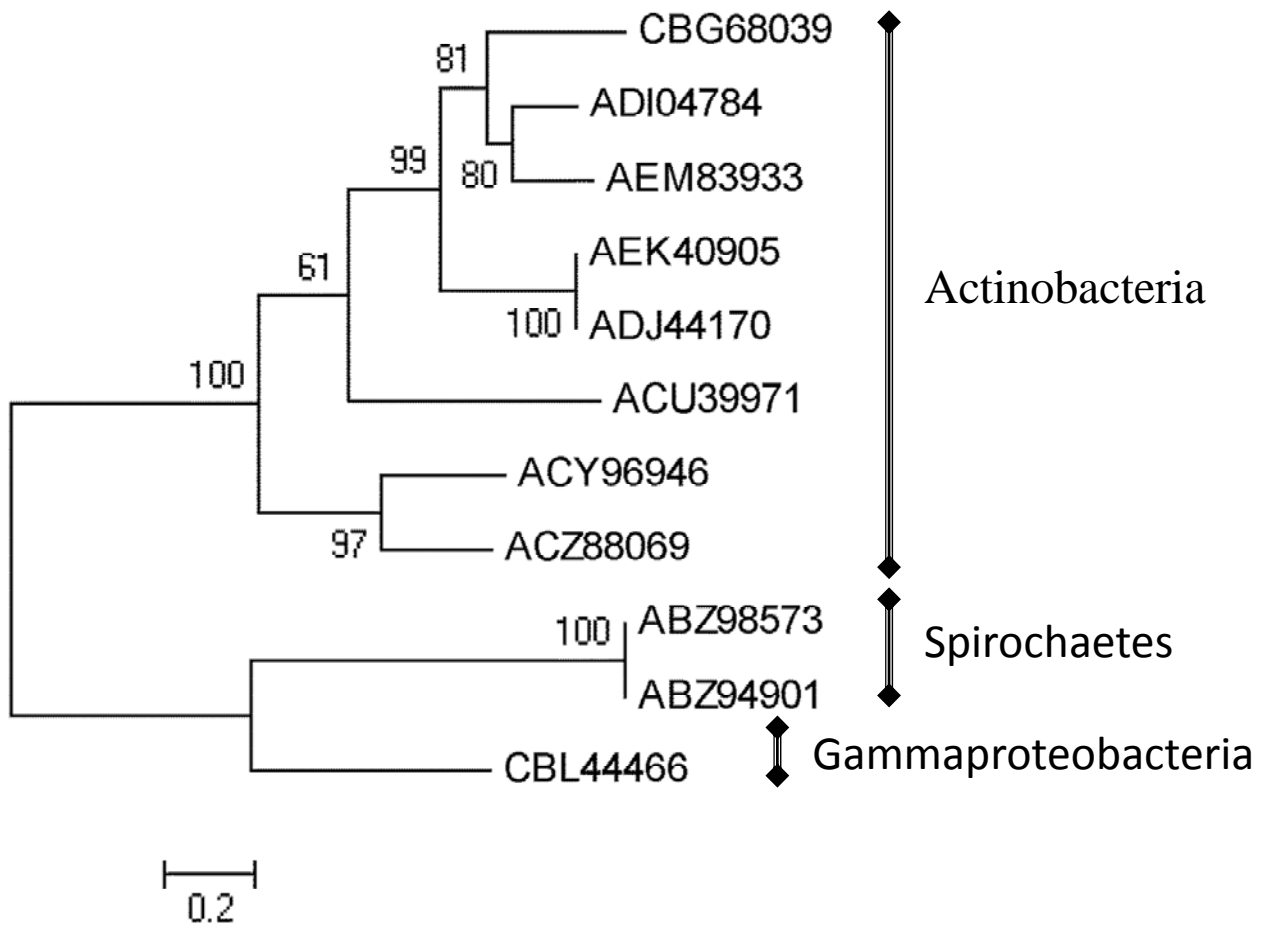

Figure GH5\_43:

Phylogenetic tree on subfamily GH5\_43 based on maximum likelihood with 100 bootstrap replications. Only the GH5 catalytic domain is used for the phylogenetic analysis. All bootstrap values are displayed.

# Figure GH5\_44

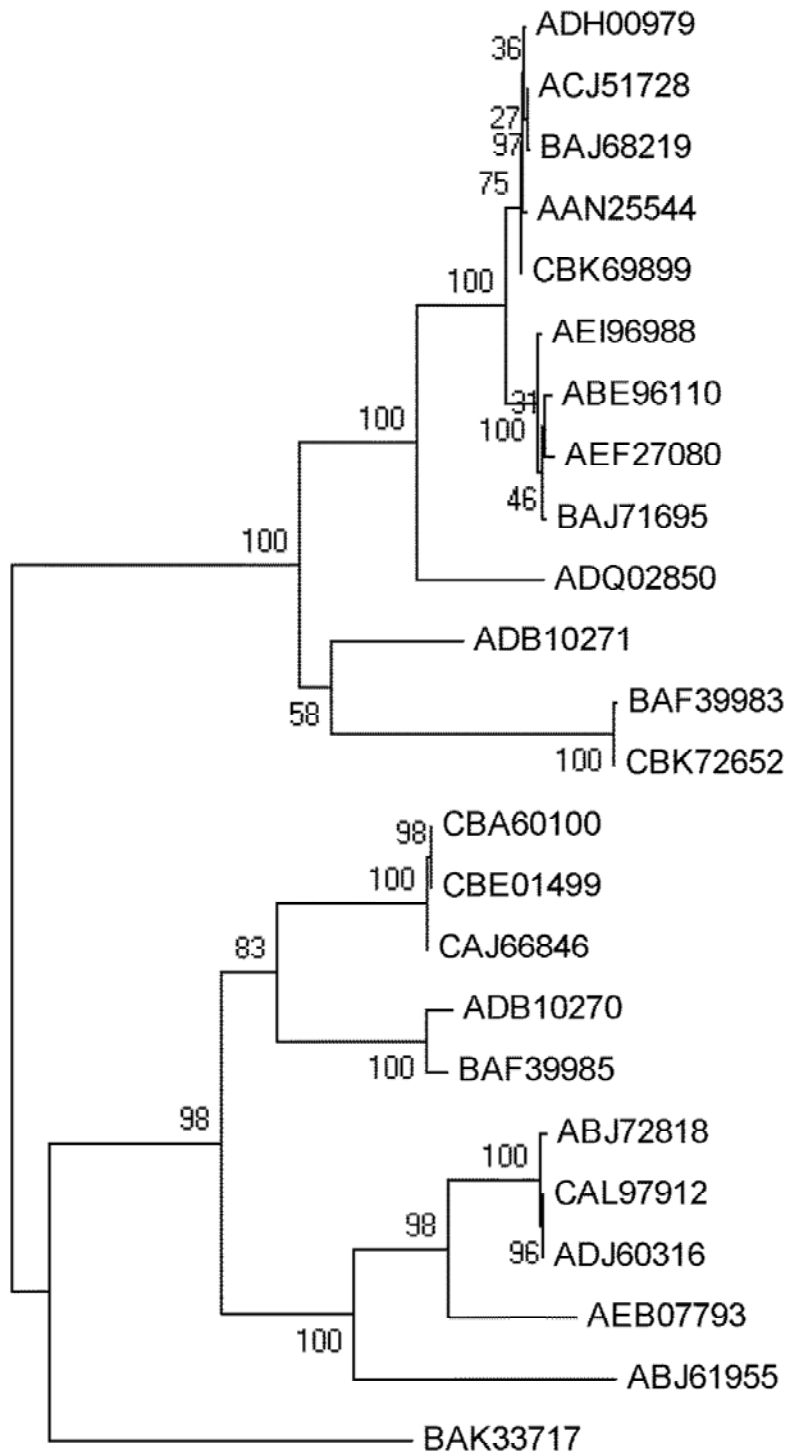

Figure GH5\_44:

0.2

Phylogenetic tree on subfamily GH5\_44 based on maximum likelihood with 100 bootstrap replications. Only the GH5 catalytic domain is used for the phylogenetic analysis. All bootstrap values are displayed.

# Figure GH5\_45

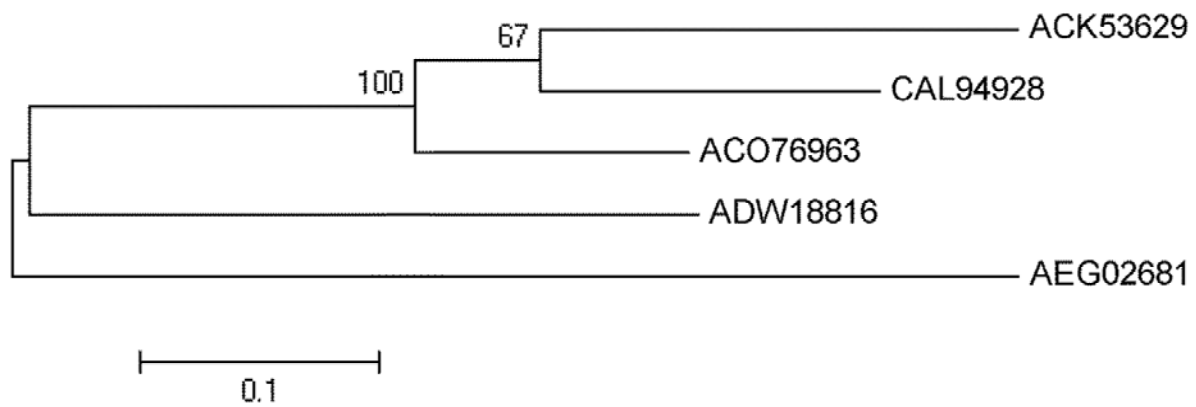

Figure GH5\_45:

Phylogenetic tree on subfamily GH5\_45 based on maximum likelihood with 100 bootstrap replications. Only the GH5 catalytic domain is used for the phylogenetic analysis. All bootstrap values are displayed.

# Figure GH5\_46

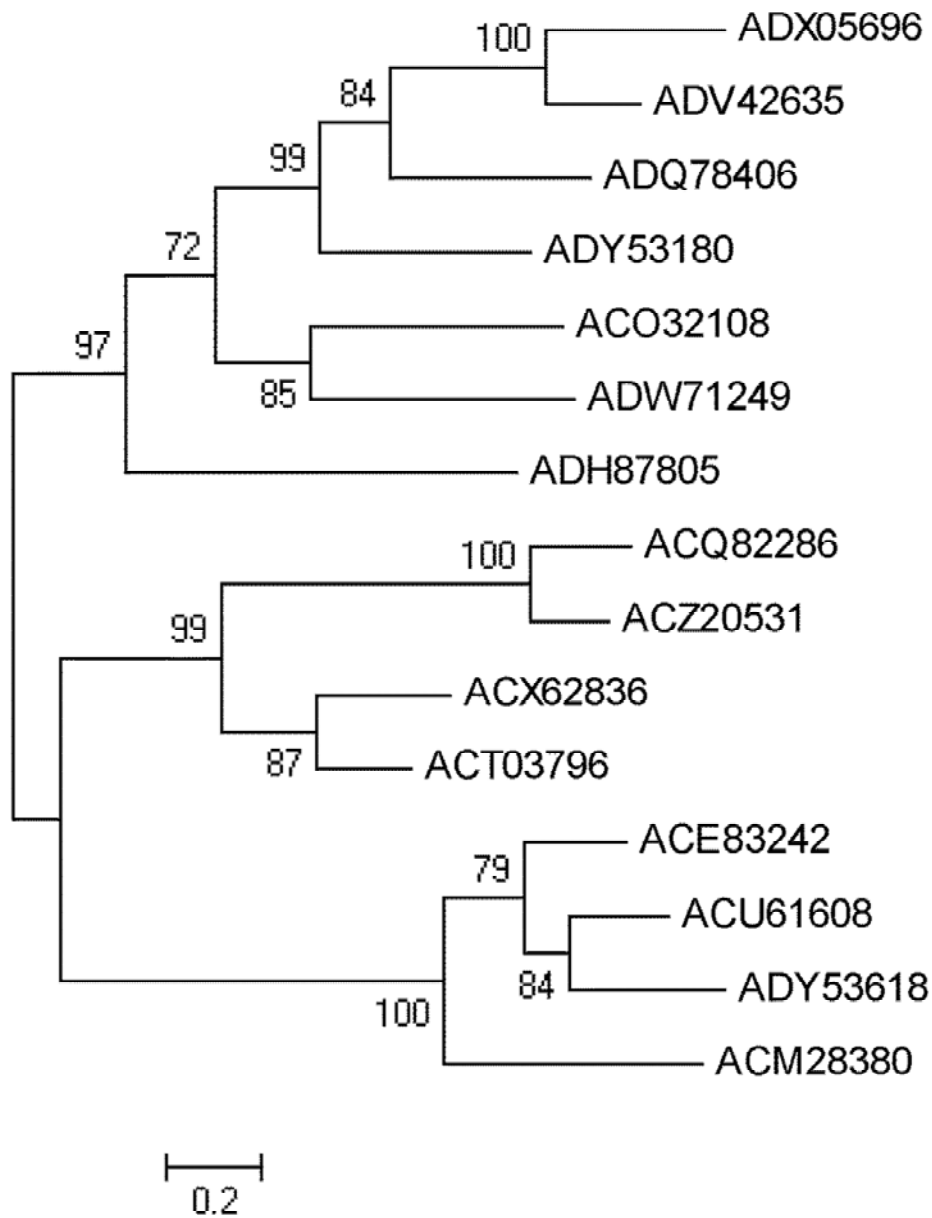

Figure GH5\_46:

Phylogenetic tree on subfamily GH5\_46 based on maximum likelihood with 100 bootstrap replications. Only the GH5 catalytic domain is used for the phylogenetic analysis. All bootstrap values are displayed.

# Figure GH5\_47

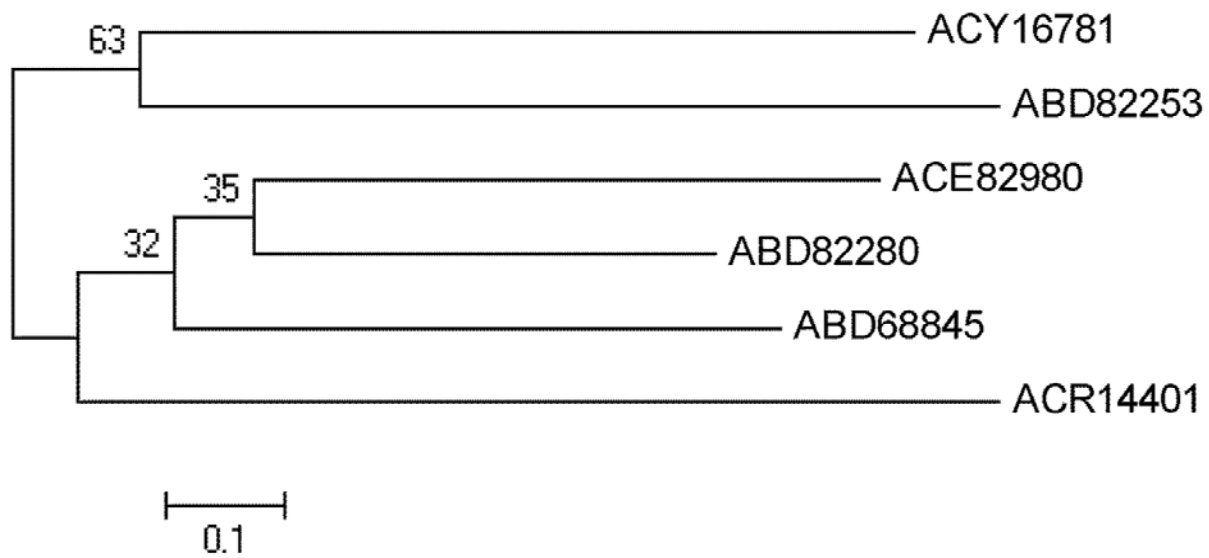

Figure GH5\_47:

Phylogenetic tree on subfamily GH5\_47 based on maximum likelihood with 100 bootstrap replications. Only the GH5 catalytic domain is used for the phylogenetic analysis. All bootstrap values are displayed.

# Figure GH5\_48

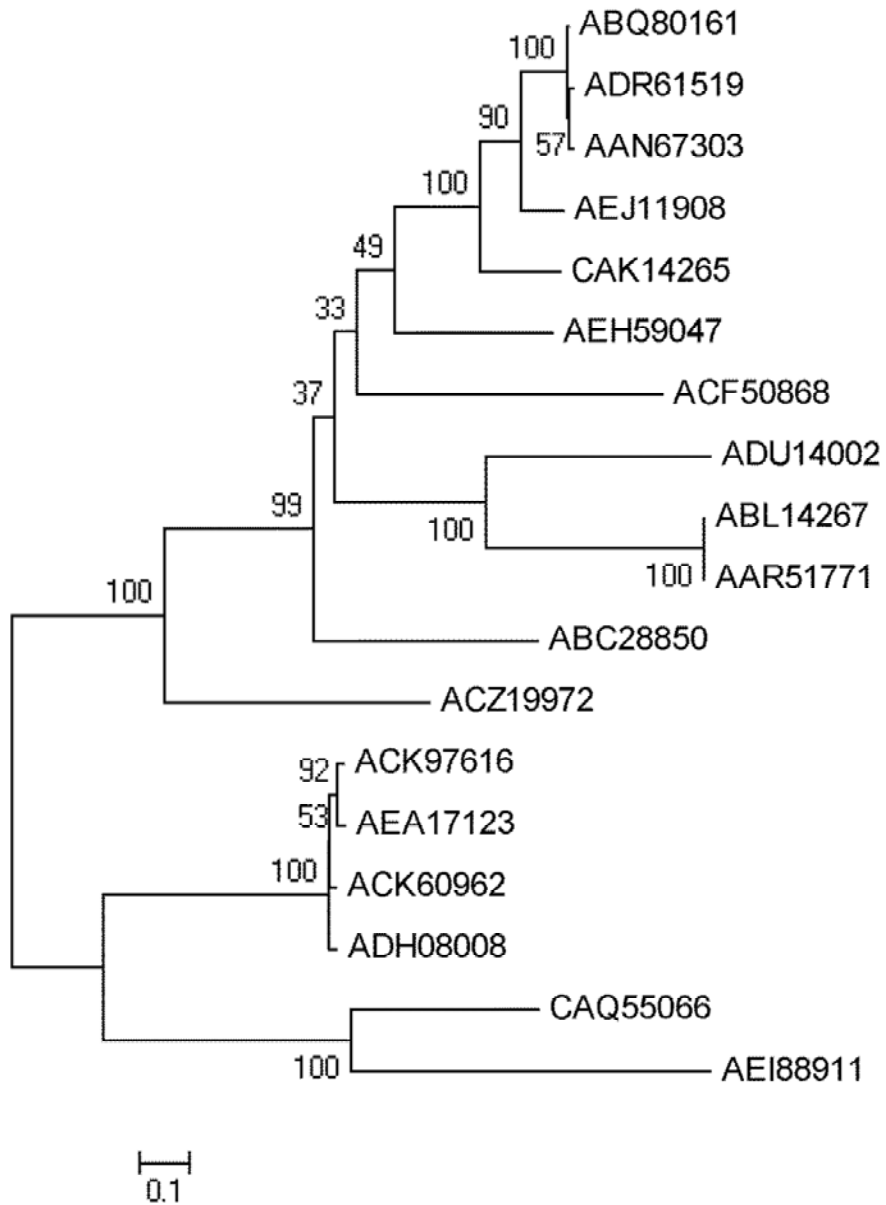

Figure GH5\_48:

Phylogenetic tree on subfamily GH5\_48 based on maximum likelihood with 100 bootstrap replications. Only the GH5 catalytic domain is used for the phylogenetic analysis. All bootstrap values are displayed.



**Figure GH5\_49**

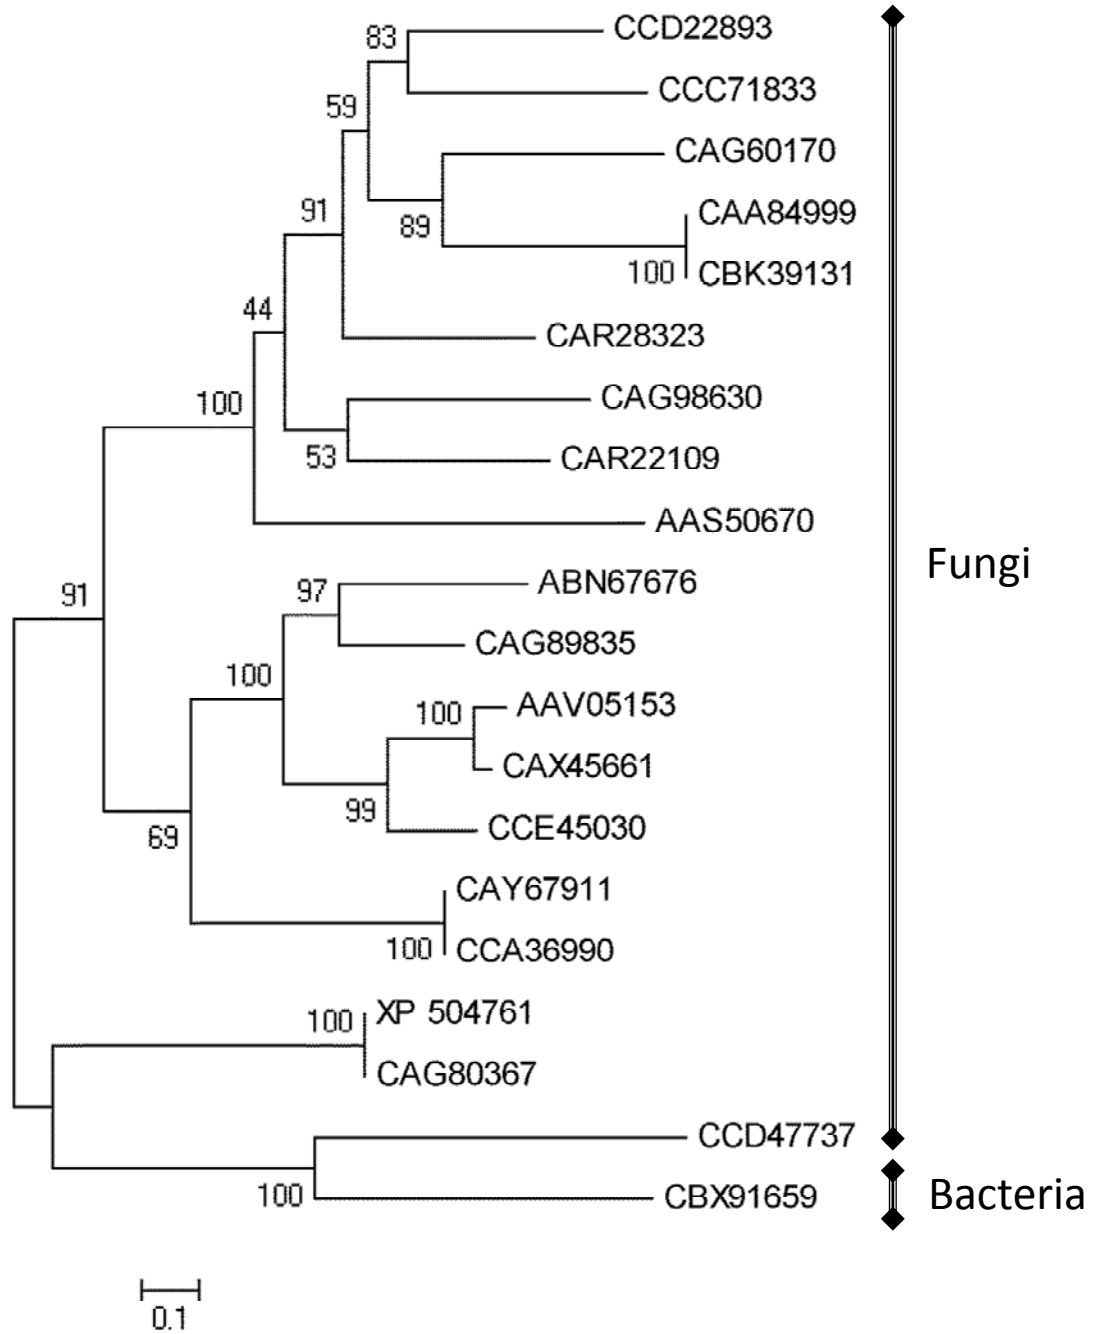

Figure GH5\_49:

Phylogenetic tree on subfamily GH5\_49 based on maximum likelihood with 100 bootstrap replications. Only the GH5 catalytic domain is used for the phylogenetic analysis. All bootstrap values are displayed.

# Figure GH5\_50

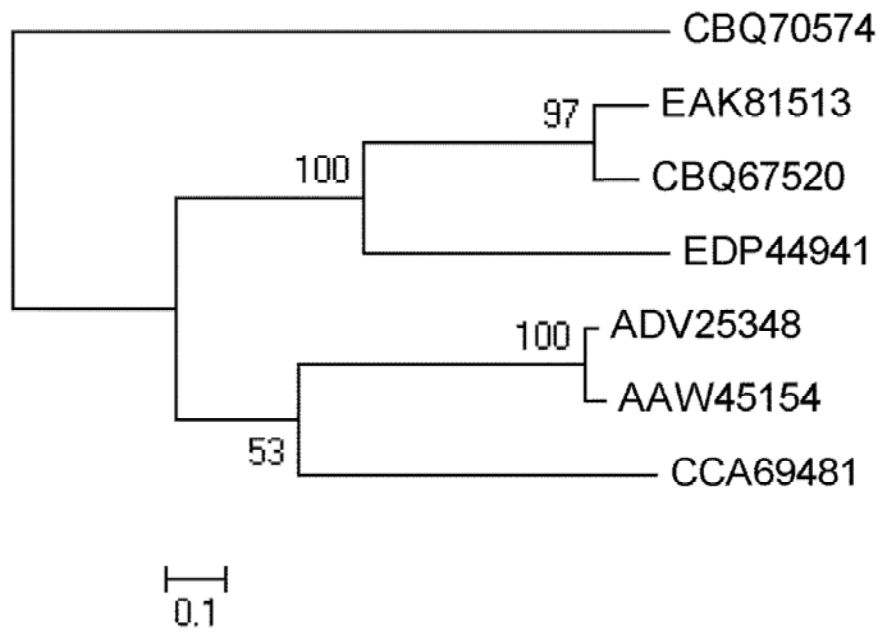

Figure GH5\_50:

Phylogenetic tree on subfamily GH5\_50 based on maximum likelihood with 100 bootstrap replications. Only the GH5 catalytic domain is used for the phylogenetic analysis. All bootstrap values are displayed.

# Figure GH5\_51

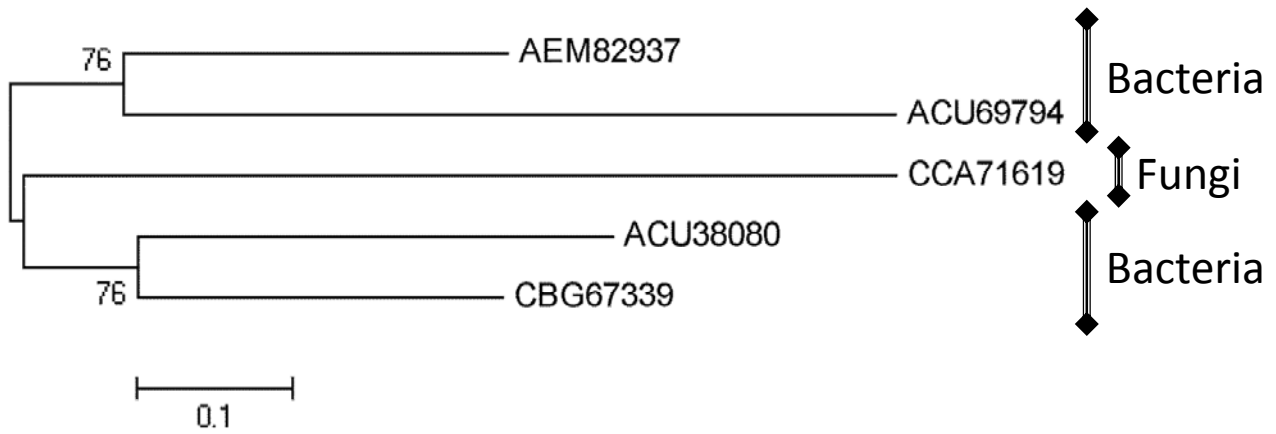

Figure GH5\_51:

Phylogenetic tree on subfamily GH5\_51 based on maximum likelihood with 100 bootstrap replications. Only the GH5 catalytic domain is used for the phylogenetic analysis. All bootstrap values are displayed.

# Figure GH5\_52

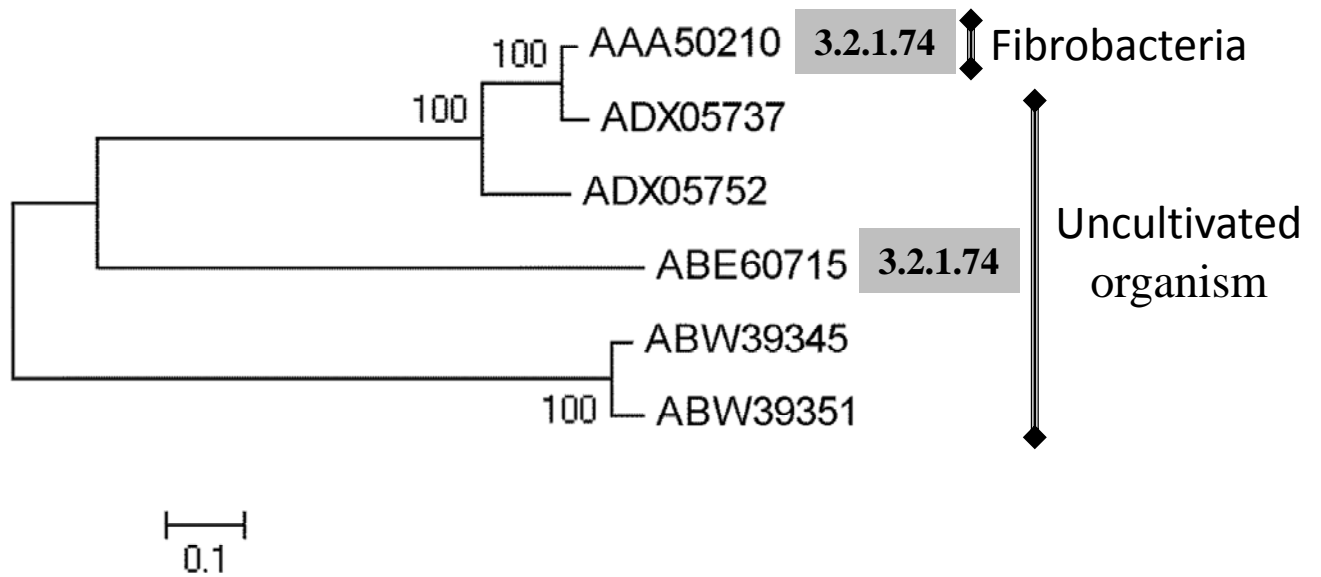

Figure GH5\_52:

Phylogenetic tree on subfamily GH5\_52 based on maximum likelihood with 100 bootstrap replications. Only the GH5 catalytic domain is used for the phylogenetic analysis. All bootstrap values are displayed.

# Figure GH5\_53

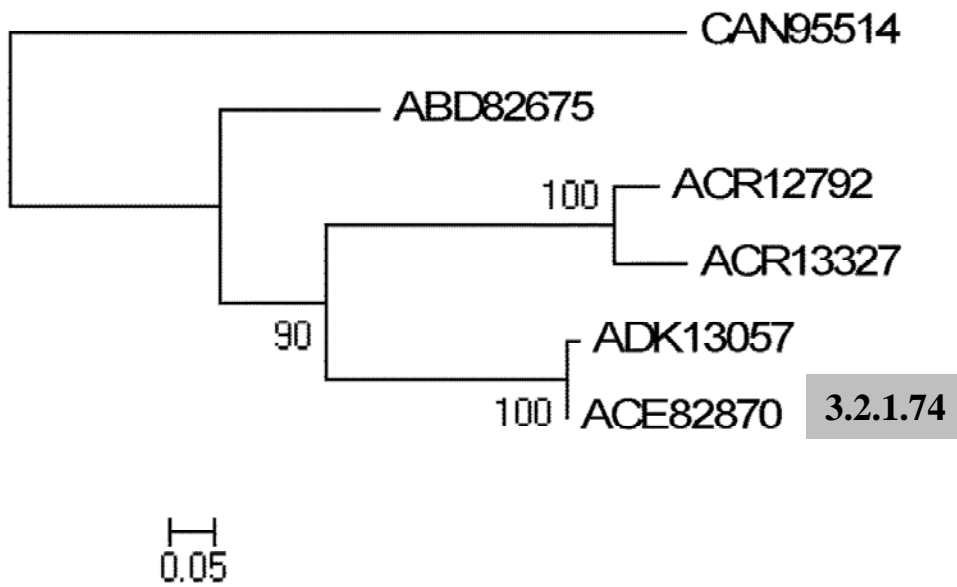

Figure GH5\_53:

Phylogenetic tree on subfamily GH5\_53 based on maximum likelihood with 100 bootstrap replications. Only the GH5 catalytic domain is used for the phylogenetic analysis. All bootstrap values are displayed.
